# 1 **Unearthing the genes of plant-beneficial marine yeast - *Wickerhamomyces*** 2 ***anomalus* strain MSD1**

3  
4 Radhesh Krishnan S<sup>1</sup>, Prabhakaran N<sup>1</sup>, Sengali Ragunath K<sup>1</sup>, Srinivasan R<sup>1</sup>,  
5 Keerthana Ponni K<sup>1</sup>, Balaji G<sup>1</sup>, Gracy M, Brindha C, Lakshmi Narayanan and  
6 Latha K<sup>1\*</sup>

7 <sup>1</sup>R & D Division Extension, T. Stanes and Company Limited, Coimbatore-641018,  
8 TN.

9 \*Correspondence: [testinglab@t-stanes.com](mailto:testinglab@t-stanes.com)

## 10 11 12 **Abstract**

13 The *de novo* genome of unique marine yeast, *Wickerhamomyces anomalus*  
14 isolated from seaweed along Indian coast is presented. The genome assembly was  
15 carried out using MaSurCA assembler that generated a data size ~14.3 mb from  
16 short and long reads obtained from Illumina Hiseq 4000 and GridION-X5  
17 respectively. This assembled genome data were used for predicting genes using  
18 Augustus gene prediction tool that reported 6720 genes and proteins. The gene  
19 sequences were used to unravel the metabolic pathway analysis using KAAS  
20 database. The protein sequences were used for secondary analysis to predict the  
21 presence of signal peptides using SignalP tool, predicting protein family, domains  
22 using Pfam tool and prediction of transmembrane helices in proteins using  
23 TMHMM tool. Presence of genes involved in plant growth-promotion and  
24 regulation (PGPR) including siderophore and IAA production, iron and sulfur  
25 transformation, zinc and phosphate solubilization, nitrogen fixation, synthesis of  
26 anti-bacterial and volatile organic compound (VOCs), were assigned. Additionally,  
27 acid and alkaline phosphatases, ACC deaminases and lytic enzymes such as  $\beta$ -  
28 glucanases, proteases and chitinases involved in pathogen suppression, are also  
29 reported. The study elucidates comprehensive understanding of PGP attributes of  
30 MSD1 and its potential use in agriculture as bio-fertilizer /bio-stimulant.

## 31 32 **Key words**

33 Industrial Microorganism, Comparative genomics, Next-generation sequencing,  
34 Genome annotation, Genes, *Wickerhamomyces anomalus*

## 35 36 **Introduction**

37 *Wickerhamomyces anomalus*, formerly known as *Pichia anomala*, *Hansenula*  
38 *anomala*, *Candida pelliculosa* was recently assigned to the genus  
39 *Wickerhamomyces* based on phylogenetic analysis of gene sequences, which has  
40 caused major changes in the classification of yeasts. This species has been  
41 frequently isolated from grapes and wines. *W. anomalus* is a biotechnologically  
42 relevant yeast species with food, environmental, industrial, and medical  
43 applications [1].

44  
45 *Wickerhamomyces anomalus* has many different roles in agriculture and the food  
46 industry. *W. anomalus* is often among the “film-forming” yeasts associated with  
47 beer spoilage [2,3], as well as the spoilage of bakery products [4]. In contrast, *W.*  
48 *anomalus* is among the consortium of yeasts and other microorganisms that are  
49 necessary for the fermentation of cocoa and coffee beans, which includes

50 degradation of pectin from the surrounding plant tissue (*Masoud and Jespersen*  
51 *2006, Schwan and Wheals 2003*). *W. anomalus* has been tested extensively for  
52 biocontrol of mold growth that develops during postharvest storage of apples and  
53 airtight-storage of grain [5,6]. As summarized by [1], *W. anomalus* can grow under  
54 conditions of extreme environmental stress, including anaerobiosis, which makes  
55 it strongly competitive with spoilage molds under storage conditions.

56  
57 The yeast has been reported for its glycosidase [7], volatile organic compound  
58 production [1] and antimicrobial [8,9] properties. This species has gained  
59 considerable importance for the wine industry since it enhances the flavor of wine  
60 [2, 5] and produces bioethanol [10]. The current report ascertains de novo  
61 genomic DNA of the isolate confirmed as (NCBI Accession number- MF174856,  
62 Safe deposit Accession number-NAIMCC-SD-0004) that was present as an  
63 epiphyte on the seaweed *Sargassum*, Mandapam Beach Park, Tamil Nadu, India.  
64 Additionally, a patent has been filed for this yeast and its use in agriculture as a  
65 Plant growth promoting yeast (Indian Patent application no. 202041036012).  
66 Annotation analysis of the whole genome sequencing (WGS) leads us in prediction  
67 and identification of key genes that are responsible for the PGPR activity of the  
68 strain MSD1.

69

## 70 **Materials and methods**

71 The marine yeast *W. anomalus* strain MSD1 was isolated from the marine  
72 macroalgae (*Sargassum* sp.) collected from Mandapam Beach Park,  
73 Rameswaram, Tamil Nadu, India [11]. MSD1 was one among the potential  
74 seaweed associated microbes (our published research [12]) possessing plant  
75 growth promoting microbe like character (Data not disclosed here).

76

## 77 **DNA Isolation, Genome Sequencing, and Assembly & Variation Identification 78 and Genome Diversity Analysis**

79 The yeast was cultured in Zobel Marine Broth (HiMedia, Mumbai, India) for 48 h  
80 at 30°C with constant shaking (150 rpm). The high quality DNA from the sample  
81 was sequenced at Genotypic Technology Pvt Ltd. India, using Hiseq 4000  
82 (Illumina) and GridION-X5 (Oxford Nanopore Sequencing Technology). The short  
83 reads (Illumina) and long reads (Nanopore) data were demultiplexed using  
84 bcl2fastq and guppy [13] respectively. Hybrid assembly was performed using  
85 Illumina and nanopore reads by MaSurCA Hybrid Assembler [14] with standard  
86 parameters. The gene and protein sequence prediction from the assembled  
87 genome was performed using Augustus tool [15]. The secondary analysis of the  
88 protein was carried out using different protein analytical tools (signalp, tmhmm,  
89 PfamScan) [16–18]. The metabolic pathways were predicted using KAAS database.

90

91

## 92 **Phylogenetic analysis**

93 Here we used genome sequence data from 17 publicly available yeast genomes  
94 representing 17 known major lineages and 2 non-yeast fungal out groups to  
95 generate phylogenetic tree. *Wickerhamomyces anomalus* NRRL Y-366-8  
96 (LWUN00000000.1), *Saccharomyces cerevisiae* (JRIV00000000.1), *Babjeviella*  
97 *inositovora* NRRL Y-12698 (LWKO00000000.1), *Suhyomyces tanzawaensis* NRRL  
98 Y-17324 (LYME00000000.1), *Metschnikowia bicuspidata* var. *bicuspidata* NRRL

99 YB-4993 (LXTC00000000.1), *Hyphopichia burtonii* NRRL Y-1933  
100 (LYBQ00000000.1), *Ascoidea rubescens* DSM 1968 (LYBR00000000.1), *Candida*  
101 *arabinofermentans* NRRL YB-2248 (LWUO00000000.1), *Tortispora caseinolytica*  
102 NRRL Y-17796 (LSKT00000000.1), *Cyberlindnera jadinii* NRRL Y-1542  
103 (LTAD00000000.1), *Hanseniaspora valbyensis* NRRL Y-1626 (LXPE00000000.1),  
104 *Ogataea polymorpha* (AECK00000000.1), *Lipomyces starkeyi* NRRL Y-11557  
105 (LSGR00000000.1), *Nadsonia fulvescens* var. *elongata* DSM 6958  
106 (LXPB00000000.1), *Pachysolen tannophilus* NRRL Y-2460 (LZCH00000000.1),  
107 *Pichia membranifaciens* NRRL Y-2026 (AEHA00000000.1), *Saitoella complicata*  
108 NRRL Y-17804 (AEUO00000000.1), *Trichoderma reesei* (AIL000000000),  
109 *Trichoderma harzianum* (JOKZ00000000.1).

110

### 111 **Comparative Genomics**

112 Assembled sequence was compared with the reference sequence to know the gene  
113 re-arrangements and genome coverage. We used BRIG to have circular genome  
114 representation and Mauve to visualize the synteny between reference genome and  
115 assembled genome.

116

### 117 **Nucleotide Sequence Accession Number**

118 This BioProject has been deposited in GenBank under accession number  
119 PRJNA556347. The sequences obtained in this project have been deposited in the  
120 NCBI Sequence Read Archive under the accession numbers SRR10092046, and  
121 SRR9822044. <https://www.ncbi.nlm.nih.gov/bioproject/PRJNA556347>.

122

### 123 **Results**

#### 124 **General genome characteristics**

125 A total of 6.71 million paired-end reads were generated for the marine yeast from  
126 Illumina and 0.37 million reads from Nanopore-GridION respectively. Read  
127 statistics are given in **Table 1** and **Table 2**.

128 The size of assembled genome generated was ~14.3 mb having 289 contigs and  
129 the longest contig was of ~0.2 mb length. Assembly was validated using blast  
130 alignment against nr database (**Table 3**).

131

132 The assembled genome sequence was used for predicting genes and protein  
133 sequences using Augustus gene prediction tool. A total of 6720 genes and  
134 proteins were predicted in the analysis. The GO annotation of the predicted  
135 genes was completed using Uniprot database and in-house scripts. Out of 6720  
136 genes predicted, 6658 genes were annotated and 64 genes remained  
137 unannotated (**Figure 1**).

138

139

140

### 141 **Comparative Genomics**

142 Reference based whole genome sequencing of *Wickerhamomyces anomalus* was  
143 carried out using reference genome available at NCBI for of *Wickerhamomyces*  
144 *anomalus*, strain- NRRL Y-366-8. More than 140 X of sequencing coverage was  
145 achieved for the genome of approximate size 14MB. More than 99% of the  
146 reference genome was covered at 1X and >93% of the reference genome was  
147 covered at 20 X by good quality data which confirms the choice of reference and

148 the sufficiency of the data for reference based WGS. The consensus sequence  
149 resulted from the analysis was compared with the reference sequence in order to  
150 know genome significant rearrangements if any (**Figure 2**).

151 Assembled sequence was compared with the reference sequence to know the gene  
152 re-arrangements and genome coverage. We used BRIG to have circular genome  
153 representation and Mauve to visualize the synteny between reference genome and  
154 assembled genome (**Figure 3**).

155

156 Pathway analysis the yeast genome was carried for using KAAS database that  
157 provided functional annotation of genes by BLAST comparisons against the  
158 manually curated KEGG GENES database [19]. The result contains KO (KEGG  
159 Orthology) assignments and automatically generated KEGG pathways  
160 (**Supplementary file 1**). The secondary analysis of protein sequences obtained  
161 from Augustus was carried out using different tools- SignalP, Pfam-Scan,  
162 TMHMM. SignalP tool predicts the presence of signal peptides and the location of  
163 their cleavage sites in proteins. A total of 521 signal peptides were predicted out  
164 of which 304 had trans-membrane segments and 217 without trans-membrane  
165 segments. Pfam-Scan tool was used to predict protein family and domains  
166 present in the predicted protein sequences. A total of 8280 pfam annotation  
167 (which includes family, domain, repeat and motif) were predicted for 6720  
168 proteins. Out of 8280 pfam annotation 5339 contained clan (group of related  
169 protein families) information and 2941 had no clan information. TMHMM tool  
170 predicts transmembrane helices in given proteins sequences. A total of 6720  
171 proteins used for transmembrane helix prediction, out of which 1377 proteins  
172 contained transmembrane helices and remaining 5343 proteins were without  
173 transmembrane helices (**Supplementary file 2-4**).

174

## 175 **Discussion**

176

### 177 **Genes identified from WGS of MSD1 related to PGPR traits**

178

179 We identified genes in the MSD1 genome attributable to the production of IAA,  
180 solubilization of minerals like phosphate and zinc, synthesis of siderophores,  
181 acetoin and 2,3-butanediol, suppression of pathogenic fungi, resistance to  
182 oxidative stress, and ability to break down toxic compounds and other abiotic  
183 stresses.

184 Here, two proposed **IAA biosynthesis** pathways, amidase and aldehyde  
185 dehydrogenase pathways are identified in the genome of MSD1. In the indole-3-  
186 acetonitrile (IAN) pathway IAN can first be converted to indole-3-acetamide (IAM)  
187 by nitrile hydratase and then IAM is converted to IAA by amidase. In the IPyA  
188 pathway indole-3-pyruvate (IPyA) is converted to indole-3-acetaldehyde (IAAld) by  
189 indolepyruvate decarboxylase and then to IAA by aldehyde dehydrogenase. All of  
190 these genes responsible for IAA synthesis were present in MSD1 genome [20].



191 Gluconic acid (GA) is recognized as one of the major organic acids in most  
192 bacteria responsible for the solubilization of mineral phosphates. The synthesis of  
193 GA is catalyzed by glucose dehydrogenase (GDH) and its co-factor pyrrolo-  
194 quinolone quinone (PQQ)[21–23]. Accordingly, the MSD1 genome was searched for  
195 the presence for phosphate transporter genes. Gene IDs PHO84 and PHO87 that  
196 encodes for inorganic phosphate transport were predicted. In addition, 5 genes  
197 encoding mitochondrial thiamine pyrophosphate transporters (solute carrier  
198 proteins) were also predicted in the MSD1 genome.

199 MSD1 carrying the gene encoding for the synthesis of **siderophore** was identified.  
200 Genes encoding isochorismate domain containing protein, Gene IDs K08197 (7  
201 copies) and K23503 (2 copies) that are annotated for siderophore-iron: H<sup>+</sup>  
202 symporter and sideroflexin respectively were predicted. These indicate that  
203 although strain MSD1 cannot synthesis numerous siderophores, it can  
204 heterologously obtain siderophores produced by other soil bacteria [20,24].

205 The MSD1 genome was predicted for the presence of a cascade of genes for Fe  
206 uptake/transport. Genes like K07243 (high-affinity iron transporter), K19791  
207 (iron transport multicopper oxidase), K12346 (metal iron transporter), K22736  
208 (vacuolar iron transporter family protein), K15113 (solute carrier family 25),  
209 K02304 (precorrin-2 dehydrogenase/sirohydrochlorin ferrochelatase), and  
210 K01772 (protoporphyrin/coproporphyrin ferrochelatase) were annotated from  
211 MSD1 genome.

212

### 213 **The genes Associated with Plant Growth Promotion Traits**

214 Previous phenotypical and PGP abilities, observed in pure culture and in plant  
215 experiments under salt stress, was supported by the MSD1 genome content  
216 (**Table 4**). The MSD1-detailed genomic profile of their confirmed PGP abilities and  
217 other possible mechanisms involved in plant promotion were analyzed and  
218 described here. It has been reported that PGPR may produce compounds such as  
219 **phenazine** and 4-hydroxybenzoate which function as antibiotics and suppress  
220 plant pathogenic microbes [24]. UbiD, involved in 4-**hydroxybenzoate** synthesis,  
221 and PhzC-PhzF, involved in phenazine synthesis, were identified in the MSD1  
222 genome. Moreover, a homologue of the gene coding for **chitinase** enzyme was  
223 identified that can potentially dissolve the cell wall of pathogenic fungal and  
224 insect pests [24]. In addition to these, the genes gabD and gabT which are  
225 responsible for the production of pest/disease inhibiting **γ-aminobutyric acid**  
226 (**GABA**) in the genome was identified [20]. This suggests that the synthesis of the  
227 three antimicrobial compounds is a widespread pathway in MSD1.

228

229 In addition to the above PGP traits, two growth-promoting **volatile organic**  
230 **compounds** (VOCs), acetoin and butanediol, were reported to promote plant  
231 growth by stimulating root formation and increasing systemic disease resistance  
232 and drought tolerance in some other very efficient PGPR[5,25–29]. Genes  
233 encoding enzymes including **acetolactate synthase** and **acetoin dehydrogenase**  
234 (Table 1) which are involved in acetoin and butanediol synthesis, were detected in

235 the genome of MSD1 [24,28,30]. Two pyruvate molecules condensed into  
236 acetolactate is catalyzed by acetolactate synthase, and which is converted to  
237 acetoin by acetolactate decarboxylase and finally acetoin is converted to **2,3-**  
238 **butanediol** catalyzed by acetoin reductase [24,28,30].

239

#### 240 **Nitrogen fixation**

241 Nitrogenase is the enzyme central to nitrogen fixation and it consists of Fe-protein  
242 encoded by *nifH* and MoFe-protein encoded by *nifDK*. Full assembly of the  
243 nitrogenase complex needs the products of at least twelve *nif* genes, especially for  
244 the processing of catalytic stability and nitrogenase metalloclusters (*nifMZ*, *nifUS*,  
245 and *nifW*) and for synthesis of a particular molybdenum cofactor (MoCFC). Many  
246 microbial gene families are responsible for organic N decomposition, metabolism,  
247 and biosynthesis in soil. Here, five gene families directly related with N cycling  
248 processes were extracted and analyzed, including *nao* (nitroalkane oxidase), *nmo*  
249 (nitronate monooxygenase), *gdh* (glutamate dehydrogenase), *ureC* (urease) and **GS**  
250 (glutamine synthetase)[21].

251 MSD1 is able to grow on nitrogen-free medium (data not shown) and this  
252 indicates that the strain is able to fix atmospheric nitrogen. The MSD1 genome  
253 contains *nif* genes together with the *NifU* and nitronate genes which are the  
254 positive/negative regulatory proteins for *nif* genes [21].

255

#### 256 **ACC Deaminase**

257 One of the mechanisms of PGPR to alleviate salt stress is the synthesis of the  
258 enzyme 1-aminocyclo-propane-1-carboxylate (ACC) deaminase or its homologue  
259 D-cysteine desulhydrase encoded by *acdS* or *dcyD*, respectively. Both enzymes  
260 lower ethylene accumulation in stressed plants by cleaving ACC, an immediate  
261 precursor of ethylene in plants, to form ammonia and  $\alpha$ -ketobutyrate. This  
262 reaction is pyridoxal phosphate dependent, and both ACC deaminase and D-  
263 cysteine desulhydrase belong to the pyridoxal phosphate-dependent enzyme  
264 family PALP. In the MSD1 genome, neither *acdS* genes nor *dcyD* genes are  
265 present but eight CDSs containing genes encoding genes belonging to the PALP  
266 domain (Table 1) was found [24,31,32]. Of these genes, presence of Cys\_K 1 and 2  
267 for Cysteine desulfurase (KO ID: K04487, 5 copies of *iscS*), Tryptophan synthase  
268 beta chain (2 copies) and L-threonine ammonia-lyase (6 copies) both show lyase  
269 activity and potentially perform ammonia synthesis similarly to the enzymes  
270 encoded by *acdS* and *dcyD*[30].

271

#### 272 **Genes of Central Metabolism and Cellular Processes**

273 Carbohydrate degradation pathways **Emden-Meyerhof pathway** and **Entner-**  
274 **Doudoroff pathway** for glucose, arabinose, mannose, trelose, mannitol, and the  
275 respective transport systems have been detected. All genes of the TCA cycle were  
276 present (**Table 1**). Exo- and polysaccharide biosynthesis and the respective  
277 transporter have been discovered (**Table 4**). A comprehensive list of detected  
278 genes is given in the **supplementary files**.

279

## 280 **Genes putatively involved in salt tolerance**

281 MSD1 can grow well in 0–12% NaCl (data not shown). Analysis of the genome  
282 reveals that strain MSD1 has a number of genes related to salt tolerance. For  
283 example, trehalose can act as an osmoprotectant under environmental stresses  
284 such as high salt or drought, low temperature or osmotic stress in many  
285 organisms. Trehalose accumulates in transgenic rice and enhances plant abiotic  
286 stress tolerance. So far five trehalose biosynthetic pathways have been found in  
287 bacteria including treS, otsA/otsB, treP, treT and treY/treZ40[30,33]. Here, two  
288 trehalose biosynthesis pathway **otsA/B**, were identified in the MSD1 genome. In  
289 the otsA/otsB pathway both glucose-6-phosphate and UDP-glucose can  
290 synthesize trehalose-6-phosphate catalyzed by trehalose-6-phosphate synthase  
291 (otsA) activity. **Trehalose-6-phosphate** is then formed from trehalose catalyzed by  
292 trehalose-6-phosphate phosphatase (**otsB**) activity. Eventually, trehalose may be  
293 hydrolyzed by trehalase (2 copies) with the generation of two glucose molecules  
294 (**Table 4**). This pathway has been recognized as a universal pathway present in  
295 microorganisms and contributes to the survival under harsh environmental  
296 conditions [30,33].

297 Moreover, a number of **osmoregulation receptors** and transport systems were  
298 determined in the MSD1 genome. These genes can encode up to 24 two  
299 component systems (TCSs), among which 21 TCSs can be functionally assigned  
300 based on the KEGG database (**Table 4**) [30,33].

301 Of those 21 assigned TCSs, 3 belong to the SSK1 (response regulator) family, two  
302 to the YPD1 (phosphorelay intermediate protein) family, 16 belong to the SLN1  
303 (sensor histidine kinase) family and one to the SKN7 (response regulator) family.  
304 The eight remaining TCS genes are annotated as sensor histidine kinase (**Table**  
305 **4**).

306 In addition, genes encoding transport systems such as K<sup>+</sup> transport systems for  
307 K<sup>+</sup> accumulation and H<sup>+</sup>/Na<sup>+</sup> antiporters (nha) for importing H<sup>+</sup> and pumping  
308 out Na<sup>+</sup> have also been found to resist hyperosmotic (Aft1 domain) stress in the  
309 genome of MSD1 (**Table 4**).

310

311 The MSD1 genome carries heat shock genes dnaJ, dnaK, groES, groEL, htpG,  
312 and grpE (**Table 4**). Moreover, the clpB gene, a **heat shock protein**, specified to  
313 be upregulated during salt stress in marine bacteria is also contained. The MSD1  
314 genome also carries CDSs encoding for **peroxidases**, **superoxidase**, and  
315 glutathione S-transferase (**Table 1**). These genes play a role in the protection of  
316 cell **oxidative stress** caused by salt stress[30,33,34].

317 The genome sequence of marine isolate *W. anomalus* strain MSD1 presented in  
318 this paper is a plant growth promoting yeast isolated from the seaweed [12]. This  
319 study showed MSD1 has potential traits such as Zinc and phosphate-solubilizing,  
320 iron and sulfate transformation capability, production of ACC deaminase,  
321 siderophore, and VOCs; making it as an effective PGP yeast. Considering a variety  
322 of complex conditions that occur in rhizospheres [35], the environmental

323 adaptability of PGPR in in situ rhizosphere became an important factor for  
324 improved plant growth-promoting capacity. In addition, initial studies focusing on  
325 the functional properties of PGPR have led to interest in the comparative analyses  
326 of pan-/core-genomes of these bacteria, which are of ecological importance for  
327 elucidating the fundamental genotypic features of PGPY [36,37].

328

### 329 **Conclusions**

330 The genetic information obtained for *W. anomalus* strain MSD1 will enable us to  
331 interpret the expressed traits of the yeast and further provide insights into the  
332 practical applications of the strain as a bio-stimulant/PGPR for agriculture use or  
333 agri-input.

334

### 335 **Data availability**

336 This whole genome sequence of the biosample SAMN12347843 has been  
337 deposited at GenBank/NCBI under the accession number SRR10092046 and  
338 BioProject number PRJNA556347. The associated Illumina HiSeq 4000 subreads  
339 are available under the SRA accession number SRR9822044.

340 <https://www.ncbi.nlm.nih.gov/bioproject/PRJNA556347>.

341

### 342 **Conflict of interest**

343 The authors declare that they have no known competing financial interests or  
344 personal relationships that could have appeared to influence the work reported in  
345 this paper.

346

### 347 **Acknowledgements**

348 The work is an outcome of the collaborative BIRAC project between T. Stanes &  
349 Company Limited and DBT, India.

350

### 351 **References**

- 352 1. Passoth V, Fredlund E, Druvefors UÅ, et al. Biotechnology, physiology and  
353 genetics of the yeast *Pichia anomala*. *FEMS Yeast Res.* 2006; 6:3–13
- 354 2. Limtong S, Into P, Attarat P. Biocontrol of rice seedling rot disease caused by  
355 *curvularia lunata* and *Helminthosporium oryzae* by epiphytic yeasts from plant  
356 leaves. *Microorganisms* 2020; 8:
- 357 3. Tay ST, Lim SL, Tan HW. Growth inhibition of *Candida* species by  
358 *Wickerhamomyces anomalus* mycocin and a lactone compound of *Aureobasidium*  
359 *pullulans*. *BMC Complement. Altern. Med.* 2014; 14:1–11
- 360 4. Coda R, Cassone A, Rizzello CG, et al. Antifungal activity of *Wickerhamomyces*  
361 *anomalus* and *Lactobacillus plantarum* during sourdough fermentation:  
362 Identification of novel compounds and long-term effect during storage of wheat  
363 bread. *Appl. Environ. Microbiol.* 2011; 77:3484–3492
- 364 5. Satora P, Tarko T, Sroka P, et al. The influence of *Wickerhamomyces anomalus*  
365 killer yeast on the fermentation and chemical composition of apple wines. *FEMS*  
366 *Yeast Res.* 2014; 14:729–740
- 367 6. Wang X, Glawe DA, Kramer E, et al. Biological Control of *Botrytis cinerea* :  
368 Interactions with Native Vineyard Yeasts from Washington State. *Phytopathology*



- 369 2018; 108:691–701
- 370 7. Padilla B, Gil J, Manzanares P. Challenges of the Non-Conventional Yeast  
371 *Wickerhamomyces anomalus* in Winemaking. *Fermentation* 2018; 4:68
- 372 8. De Ingeniis J, Raffaelli N, Ciani M, et al. *Pichia anomala* DBVPG 3003 Secretes  
373 a Ubiquitin-Like Protein That Has Antimicrobial Activity. *Appl. Environ.*  
374 *Microbiol.* 2009; 75:1129–1134
- 375 9. Schneider J, Rupp O, Trost E, et al. Genome sequence of *Wickerhamomyces*  
376 *anomalus* DSM 6766 reveals genetic basis of biotechnologically important  
377 antimicrobial activities. *FEMS Yeast Res.* 2012; 12:382–386
- 378 10. Swangkeaw J, Vichitphan S, Butzke CE, et al. The characterisation of a  
379 novel *Pichia anomala*  $\beta$ -glucosidase with potentially aroma-enhancing capabilities  
380 in wine. *Ann. Microbiol.* 2009; 59:335–343
- 381 11. Singh RP, Reddy CRK. Seaweed-microbial interactions: Key functions of  
382 seaweed-associated bacteria. *FEMS Microbiol. Ecol.* 2014; 88:213–230
- 383 12. Srinivasan R, Ragunath K, Karuppiyah V, et al. Isolation and screening of  
384 seaweed associated microbes for development of marine based Agri -inputs.  
385 *Seaweed Res. Util.* 2017; 39:8
- 386 13. Wick RR, Judd LM, Holt KE. Performance of neural network basecalling tools  
387 for Oxford Nanopore sequencing. *Genome Biol.* 2019; 20:129
- 388 14. Zimin A V., Marçais G, Puiu D, et al. The MaSuRCA genome assembler.  
389 *Bioinformatics* 2013; 29:2669–2677
- 390 15. Stanke M, Keller O, Gunduz I, et al. AUGUSTUS: ab initio prediction of  
391 alternative transcripts. *Nucleic Acids Res.* 2006; 34:W435–W439
- 392 16. Krogh A, Larsson B, von Heijne G, et al. Predicting transmembrane protein  
393 topology with a hidden markov model: application to complete genomes  
394 Edited by F. Cohen. *J. Mol. Biol.* 2001; 305:567–580
- 395 17. Petersen TN, Brunak S, von Heijne G, et al. SignalP 4.0: discriminating signal  
396 peptides from transmembrane regions. *Nat. Methods* 2011; 8:785–786
- 397 18. Finn RD, Mistry J, Tate J, et al. The Pfam protein families database. *Nucleic*  
398 *Acids Res.* 2010; 38:D211–D222
- 399 19. Moriya Y, Itoh M, Okuda S, et al. KAAS: an automatic genome annotation and  
400 pathway reconstruction server. *Nucleic Acids Res.* 2007; 35:W182–W185
- 401 20. Luziatelli F, Ficca AG, Cardarelli M, et al. Genome sequencing of *Pantoea*  
402 *agglomerans* C1 provides insights into molecular and genetic mechanisms of  
403 plant growth-promotion and tolerance to heavy metals. *Microorganisms* 2020;  
404 8:1–19
- 405 21. Tsurumaru H, Okubo T, Okazaki K, et al. Metagenomic analysis of the  
406 bacterial community associated with the taproot of sugar beet. *Microbes Environ.*  
407 2015; 30:63–69
- 408 22. Shrivastava M, Rajpurohit YS, Misra HS, et al. Survival of phosphate-  
409 solubilizing bacteria against DNA damaging agents. *Can. J. Microbiol.* 2010;  
410 56:822–830
- 411 23. Choi O, Kim J, Kim JG, et al. Pyrroloquinoline quinone is a plant growth  
412 promotion factor produced by *Pseudomonas fluorescens* B16. *Plant Physiol.*  
413 2008; 146:657–668
- 414 24. Gupta A, Gopal M, Thomas G V., et al. Whole genome sequencing and  
415 analysis of plant growth promoting bacteria isolated from the rhizosphere of  
416 plantation crops coconut, cocoa and arecanut. *PLoS One* 2014; 9:
- 417 25. Schneider J, Rupp O, Trost E, et al. Genome sequence of *Wickerhamomyces*  
418 *anomalus* DSM 6766 reveals genetic basis of biotechnologically important  
419 antimicrobial activities. *FEMS Yeast Res.* 2012; 12:382–386

- 420 26. Bailly A, Weiskopf L. Mining the volatiles of plant-associated microbiota  
421 for new biocontrol solutions. *Front. Microbiol.* 2017; 8:1–12
- 422 27. Gong AD, Li HP, Shen L, et al. The *Shewanella* algae strain YM8 produces  
423 volatiles with strong inhibition activity against *Aspergillus* pathogens and  
424 aflatoxins. *Front. Microbiol.* 2015; 6:1–12
- 425 28. Fincheira P, Quiroz A. Microbial volatiles as plant growth inducers. *Microbiol.*  
426 *Res.* 2018; 208:63–75
- 427 29. Parafati L, Vitale A, Restuccia C, et al. Performance evaluation of volatile  
428 organic compounds by antagonistic yeasts immobilized on hydrogel spheres  
429 against gray, green and blue postharvest decays. *Food Microbiol.* 2017; 63:191–  
430 198
- 431 30. Liu W, Wang Q, Hou J, et al. Whole genome analysis of halotolerant and  
432 alkalotolerant plant growth-promoting rhizobacterium *Klebsiella* sp. D5A. *Sci.*  
433 *Rep.* 2016; 6:20–22
- 434 31. Khan MS, Zaidi A, Musarrat J. Phosphate solubilizing microorganisms:  
435 Principles and application of microphos technology. *Phosphate Solubilizing*  
436 *Microorg. Princ. Appl. Microphos Technol.* 2014;
- 437 32. Ma W, Sebestianova SB, Sebestian J, et al. Prevalence of 1-  
438 aminocyclopropane-1-carboxylate deaminase in *Rhizobium* spp. *Antonie van*  
439 *Leeuwenhoek, Int. J. Gen. Mol. Microbiol.* 2003; 83:285–291
- 440 33. Suarez C, Ratering S, Hain T, et al. Complete genome sequence of the plant  
441 growth-promoting bacterium *Hartmanniella* diazotrophicus strain E19T. *Int. J.*  
442 *Genomics* 2019; 2019:
- 443 34. Zarei A, Brikis CJ, Bajwa VS, et al. Plant glyoxylate/succinic semialdehyde  
444 reductases: Comparative biochemical properties, function during chilling stress,  
445 and subcellular localization. *Front. Plant Sci.* 2017; 8:1–13
- 446 35. Berg G, Smalla K. Plant species and soil type cooperatively shape the  
447 structure and function of microbial communities in the rhizosphere. *FEMS*  
448 *Microbiol. Ecol.* 2009; 68:1–13
- 449 36. Khunnamwong P, Lertwattanasakul N, Jindamorakot S, et al. Evaluation of  
450 antagonistic activity and mechanisms of endophytic yeasts against pathogenic  
451 fungi causing economic crop diseases. *Folia Microbiol. (Praha).* 2020; 65:573–590
- 452 37. Kumla J, Nundaeng S, Suwannarach N, et al. Evaluation of Multifarious Plant  
453 Growth Promoting Trials of Yeast Isolated from the Soil of Assam Tea (*Camellia*  
454 *sinensis* var. *assamica*) Plantations in Northern Thailand. *Microorganisms* 2020;  
455 8:1168

456

457

458

459

460

461

462

463

464

465

466

467

468

## Tables

469

**Table 1.** Illumina Read Statistics

| Sample                             | Read Count             |
|------------------------------------|------------------------|
| Total raw reads (in million)       | 6713813 (Read1, Read2) |
| Total processed reads (in million) | 6417015(Read1, Read2)  |

470

471

**Table 2.** Nanopore Read Statistics

| Parameters                          | Read Stat |
|-------------------------------------|-----------|
| Reads Generated                     | 374070    |
| Maximum Read Length                 | 61005     |
| Minimum Read Length                 | 94        |
| Average Read Length                 | 1177.6    |
| Median Read Length                  | 2311      |
| Total Reads Length                  | 440506966 |
| Total Number of Non-ATGC Characters | 0         |
| Percentage of Non-ATGC Characters   | 0         |
| Reads >= 100 bp                     | 374067    |
| Reads >= 200 bp                     | 372318    |
| Reads >= 500 bp                     | 241259    |
| Reads >= 1 Kbp                      | 125627    |
| Reads >= 10 Kbp                     | 1861      |
| N50 value                           | 1847      |

472

473

**Table 3.** Assembly statistics

| Parameter                           | Statistical data |
|-------------------------------------|------------------|
| Contigs Generated                   | 289              |
| Maximum Contig Length               | 275125           |
| Minimum Contig Length               | 3374             |
| Average Contig Length               | 49645.9          |
| Median Contig Length                | 51021            |
| Total Contigs Length                | 14347675         |
| Total Number of Non-ATGC Characters | 0                |
| Percentage of Non-ATGC Characters   | 0                |
| Contigs >= 1 Kbp                    | 289              |
| Contigs >= 10 Kbp                   | 259              |
| N50 value                           | 83236            |

474

475

476

477

478

**Table 4. Genes related to Plant Growth Promoting traits that are annotated to be present in *Wickerhamomyces anomalus* strain MSD1**

| Attributes                  | Gene or protein ID | Gene Annotation        |
|-----------------------------|--------------------|------------------------|
| <b>Indole-3-Acetic acid</b> | K01426             | Amidase                |
|                             | K00128             | Aldehyde dehydrogenase |
|                             | K01568             | pyruvate decarboxylase |

|                                                  |          |                                                                                                                                                                                                                                                                                                                                    |
|--------------------------------------------------|----------|------------------------------------------------------------------------------------------------------------------------------------------------------------------------------------------------------------------------------------------------------------------------------------------------------------------------------------|
|                                                  |          |                                                                                                                                                                                                                                                                                                                                    |
| <b>GABA production</b>                           |          |                                                                                                                                                                                                                                                                                                                                    |
| <b><i>gabD</i></b>                               | g6155.t1 | succinate-semialdehyde dehydrogenase (NAD <sup>+</sup> ) activity [GO:0004777]; succinate-semialdehyde dehydrogenase [NAD(P) <sup>+</sup> ] activity [GO:0009013]; cellular response to oxidative stress [GO:0034599]; gamma-aminobutyric acid catabolic process [GO:0009450]; glutamate decarboxylation to succinate [GO:0006540] |
| <b><i>gabT</i></b>                               | g4127.t1 | cytosol [GO:0005829]; 4-aminobutyrate transaminase activity [GO:0003867]; pyridoxal phosphate binding [GO:0030170]; gamma-aminobutyric acid catabolic process [GO:0009450]                                                                                                                                                         |
|                                                  | g5717.t1 | cytosol [GO:0005829]; 4-aminobutyrate transaminase activity [GO:0003867]; pyridoxal phosphate binding [GO:0030170]; gamma-aminobutyric acid catabolic process [GO:0009450]                                                                                                                                                         |
| <b>Antimicrobial</b>                             |          |                                                                                                                                                                                                                                                                                                                                    |
| <b>Phenazine</b>                                 | g6439.t1 | Phenazine biosynthesis-like protein                                                                                                                                                                                                                                                                                                |
| <b>Acetoin and 2,3 butanediol synthesis</b>      |          |                                                                                                                                                                                                                                                                                                                                    |
|                                                  | K01653   | Acetolactate synthase 1                                                                                                                                                                                                                                                                                                            |
|                                                  | K01652   | Acetolactate synthase                                                                                                                                                                                                                                                                                                              |
|                                                  | K00004   | BDH; (R,R)-butanediol dehydrogenase / meso-butane-2,3-diol dehydrogenase / diacetyl reductase [EC:1.1.1.4 1.1.1.-1.1.1.303]                                                                                                                                                                                                        |
| <b>Phosphate</b>                                 | K08176   | PHO84; MFS transporter, PHS family, inorganic phosphate transporter                                                                                                                                                                                                                                                                |
|                                                  | K14430   | PHO87_91; phosphate transporter                                                                                                                                                                                                                                                                                                    |
|                                                  | K15108   | SLC25A19; solute carrier family 25 (mitochondrial thiamine pyrophosphate transporter), member 19                                                                                                                                                                                                                                   |
|                                                  | K14684   | SLC25A23S; solute carrier family 25 (mitochondrial phosphate transporter), member 23/24/25/41                                                                                                                                                                                                                                      |
|                                                  | K15102   | SLC25A3; solute carrier family 25 (mitochondrial phosphate transporter), member 3                                                                                                                                                                                                                                                  |
| <b>Antimicrobial compound</b>                    |          |                                                                                                                                                                                                                                                                                                                                    |
| <b>Chitinase production</b>                      | K01183   | Putative chitinase II                                                                                                                                                                                                                                                                                                              |
| <b>GABA</b>                                      | K00135   | succinate-semialdehyde dehydrogenase                                                                                                                                                                                                                                                                                               |
| <b>Other PGPR fitness conferring genes</b>       |          |                                                                                                                                                                                                                                                                                                                                    |
|                                                  | K01480   | speB; agmatinase                                                                                                                                                                                                                                                                                                                   |
|                                                  | K00797   | speE; spermidine synthase                                                                                                                                                                                                                                                                                                          |
|                                                  | K00802   | SMS; spermine synthase [EC:2.5.1.22]                                                                                                                                                                                                                                                                                               |
| <b>Resistance to antifungal drugs</b>            |          |                                                                                                                                                                                                                                                                                                                                    |
|                                                  | K03327   | TC.MATE; multidrug resistance protein, MATE family                                                                                                                                                                                                                                                                                 |
|                                                  | K08157   | TPO1; MFS transporter, DHA1 family, multidrug resistance protein                                                                                                                                                                                                                                                                   |
|                                                  | K08165   | ATR1; MFS transporter, DHA2 family, multidrug resistance protein                                                                                                                                                                                                                                                                   |
|                                                  | K08158   | MDR1; MFS transporter, DHA1 family, multidrug resistance protein                                                                                                                                                                                                                                                                   |
| <b>Siderophore production (Iron homeostasis)</b> |          |                                                                                                                                                                                                                                                                                                                                    |
|                                                  | g2983.t1 | catalytic activity [GO:0003824]                                                                                                                                                                                                                                                                                                    |
|                                                  | g4122.t1 | nicotinamidase activity [GO:0008936]                                                                                                                                                                                                                                                                                               |
|                                                  | K08197   | ARN; MFS transporter, SIT family, siderophore-iron:H <sup>+</sup>                                                                                                                                                                                                                                                                  |



|                                       |          |                                                                                                                                                                                                                                                                                 |
|---------------------------------------|----------|---------------------------------------------------------------------------------------------------------------------------------------------------------------------------------------------------------------------------------------------------------------------------------|
|                                       |          | symporter                                                                                                                                                                                                                                                                       |
|                                       | K23503   | SFXN5; sideroflexin-5                                                                                                                                                                                                                                                           |
|                                       |          |                                                                                                                                                                                                                                                                                 |
| <b>Fe transport</b>                   | K07243   | FTR; high-affinity iron transporter                                                                                                                                                                                                                                             |
|                                       | K19791   | FET3_5; iron transport multicopper oxidase                                                                                                                                                                                                                                      |
|                                       | K12346   | SMF; metal iron transporter                                                                                                                                                                                                                                                     |
|                                       | K22736   | VIT; vacuolar iron transporter family protein                                                                                                                                                                                                                                   |
|                                       | K07243   | FTR; high-affinity iron transporter                                                                                                                                                                                                                                             |
|                                       | K15113   | SLC25A28_37; solute carrier family 25 (mitochondrial iron transporter), member 28/37                                                                                                                                                                                            |
|                                       | K02304   | MET8; precorrin-2 dehydrogenase / sirohydrochlorin ferrochelatase [EC:1.3.1.76 4.99.1.4]                                                                                                                                                                                        |
|                                       | K01772   | hemH; protoporphyrin/coproporphyrin ferrochelatase [EC:4.99.1.1 4.99.1.9]                                                                                                                                                                                                       |
|                                       |          |                                                                                                                                                                                                                                                                                 |
| <b>Sulfur metabolism</b>              | g1937.t1 | Sulfate adenylyltransferase (EC 2.7.7.4) (ATP-sulfurylase) (Sulfate adenylyl transferase) (SAT)                                                                                                                                                                                 |
|                                       | g5561.t1 | Adenylyl-sulfate kinase (EC 2.7.1.25)                                                                                                                                                                                                                                           |
|                                       | g6660.t1 | Glutathione synthetase (GSH-S) (EC 6.3.2.3)                                                                                                                                                                                                                                     |
|                                       |          |                                                                                                                                                                                                                                                                                 |
| <b>Potassium</b>                      | g381.t1  | Putative hydrolase of sodium-potassium ATPase alpha subunit                                                                                                                                                                                                                     |
|                                       | g2155.t1 | K <sup>+</sup> potassium transporter                                                                                                                                                                                                                                            |
|                                       | g4374.t1 | Putative hydrolase of sodium-potassium ATPase alpha subunit                                                                                                                                                                                                                     |
|                                       | g139.t1  | potassium ion transport [GO:0006813]; protein insertion into mitochondrial inner membrane from matrix [GO:0032979]; proton transmembrane transport [GO:1902600]                                                                                                                 |
|                                       | g1052.t1 | cellular potassium ion homeostasis [GO:0030007]; positive regulation of mitochondrial translation [GO:0070131]; potassium ion transport [GO:0006813]; protein insertion into mitochondrial inner membrane from matrix [GO:0032979]; proton transmembrane transport [GO:1902600] |
|                                       | g1718.t1 | potassium ion transport [GO:0006813]; protein insertion into mitochondrial inner membrane from matrix [GO:0032979]; proton transmembrane transport [GO:1902600]                                                                                                                 |
|                                       |          |                                                                                                                                                                                                                                                                                 |
| <b>Zinc transport</b>                 | K14709   | SLC39A1_2_3; solute carrier family 39 (zinc transporter), member 1/2/3                                                                                                                                                                                                          |
|                                       | K14688   | SLC30A1; solute carrier family 30 (zinc transporter), member 1                                                                                                                                                                                                                  |
|                                       | K14713   | SLC39A7; solute carrier family 39 (zinc transporter), member 7                                                                                                                                                                                                                  |
|                                       | K07238   | TC.ZIP; zinc transporter, ZIP family                                                                                                                                                                                                                                            |
|                                       | K14692   | SLC30A5_7; solute carrier family 30 (zinc transporter), member 5/7                                                                                                                                                                                                              |
|                                       |          |                                                                                                                                                                                                                                                                                 |
| <b>Resistance to oxidative stress</b> |          |                                                                                                                                                                                                                                                                                 |
| <b>Peroxidase</b>                     | K00432   | gpx; glutathione peroxidase                                                                                                                                                                                                                                                     |
|                                       | K03564   | BCP; peroxiredoxin Q/BCP                                                                                                                                                                                                                                                        |
| <b>Catalase</b>                       | K03781   | katE; catalase                                                                                                                                                                                                                                                                  |
| <b>superoxide dismutase</b>           | K04564   | SOD2; superoxide dismutase, Fe-Mn family                                                                                                                                                                                                                                        |
|                                       | K04565   | SOD1; superoxide dismutase, Cu-Zn family                                                                                                                                                                                                                                        |
| <b>glutathione S-transferase</b>      | K00799   | GST; glutathione S-transferase                                                                                                                                                                                                                                                  |
| <b>Hydroperoxide</b>                  | K03386   | PRDX2_4; peroxiredoxin (alkyl hydroperoxide reductase subunit C)                                                                                                                                                                                                                |
| <b>Heat shock</b>                     | K03687   | GRPE; molecular chaperone GrpE                                                                                                                                                                                                                                                  |
|                                       | K03686   | dnaJ; molecular chaperone DnaJ                                                                                                                                                                                                                                                  |
|                                       | K04043   | dnaK; molecular chaperone DnaK                                                                                                                                                                                                                                                  |

|                                                                     |        |                                                                         |
|---------------------------------------------------------------------|--------|-------------------------------------------------------------------------|
| <b>Rhodamese</b>                                                    | K11996 | MOCS3; adenylyltransferase and sulfurtransferase [EC:2.7.7.80 2.8.1.11] |
| <b>Genes involved in the N cycle</b>                                |        |                                                                         |
| <b>Nitrogenase complex</b>                                          | K04487 | iscS; cysteine desulfurase [EC:2.8.1.7]                                 |
| <b>Genes involved in salt tolerance</b>                             |        |                                                                         |
| <b>Trehalose Metabolism</b>                                         | K16055 | TPS; trehalose 6-phosphate synthase/phosphatase [EC:2.4.1.15 3.1.3.12]  |
|                                                                     | K22337 | TSL1; trehalose 6-phosphate synthase complex regulatory subunit         |
|                                                                     | K00697 | otsA; trehalose 6-phosphate synthase [EC:2.4.1.15 2.4.1.347]            |
|                                                                     | K01194 | TREH; alpha,alpha-trehalase [EC:3.2.1.28]                               |
| <b>Genes involved in Na<sup>+</sup> and K<sup>+</sup> transport</b> |        |                                                                         |
|                                                                     | K03316 | TC.CPA1; monovalent cation:H <sup>+</sup> antiporter, CPA1 family       |
|                                                                     | K01507 | ppa; inorganic pyrophosphatase [EC:3.6.1.1]                             |

479  
480  
481

|                                             |          |                                                                                                                                                                                                                                                                                                       |
|---------------------------------------------|----------|-------------------------------------------------------------------------------------------------------------------------------------------------------------------------------------------------------------------------------------------------------------------------------------------------------|
| <b>Genes involved in pH wide adaptation</b> |          |                                                                                                                                                                                                                                                                                                       |
| <b>Acid expressed</b>                       | K05389   | KCNKF; potassium channel subfamily K, other eukaryote                                                                                                                                                                                                                                                 |
|                                             | K14429   | SLC12A9; solute carrier family 12 (potassium/chloride transporters), member 9                                                                                                                                                                                                                         |
|                                             | K13754   | SLC24A6; solute carrier family 24 (sodium/potassium/calcium exchanger), member 6                                                                                                                                                                                                                      |
|                                             | K04078   | groES; chaperonin GroES                                                                                                                                                                                                                                                                               |
|                                             | K04077   | groEL; chaperonin GroEL                                                                                                                                                                                                                                                                               |
|                                             | K04043   | dnaK; molecular chaperone DnaK                                                                                                                                                                                                                                                                        |
|                                             | K03695   | clpB; ATP-dependent Clp protease ATP-binding subunit ClpB                                                                                                                                                                                                                                             |
|                                             | K03544   | clpX; ATP-dependent Clp protease ATP-binding subunit ClpX                                                                                                                                                                                                                                             |
| <b>Alkaline expressed</b>                   | K07300   | chaA; Ca <sup>2+</sup> :H <sup>+</sup> antiporter                                                                                                                                                                                                                                                     |
|                                             | K03316   | TC.CPA1; monovalent cation:H <sup>+</sup> antiporter, CPA1 family                                                                                                                                                                                                                                     |
|                                             | K23541   | TMEM165; Ca <sup>2+</sup> /H <sup>+</sup> antiporter, TMEM165/GDT1 family                                                                                                                                                                                                                             |
|                                             | K03316   | TC.CPA1; monovalent cation:H <sup>+</sup> antiporter, CPA1 family                                                                                                                                                                                                                                     |
|                                             | K08744   | CRLS; cardiolipin synthase (CMP-forming) [EC:2.7.8.41]                                                                                                                                                                                                                                                |
|                                             | K08744   | CRLS; cardiolipin synthase (CMP-forming) [EC:2.7.8.41]                                                                                                                                                                                                                                                |
|                                             | K20498   | DSD1; D-serine ammonia-lyase [EC:4.3.1.18]                                                                                                                                                                                                                                                            |
|                                             | K17989   | SDS; L-serine/L-threonine ammonia-lyase [EC:4.3.1.17 4.3.1.19]                                                                                                                                                                                                                                        |
| <b>Resistance to heavy metals</b>           |          |                                                                                                                                                                                                                                                                                                       |
| <b>Divalent</b>                             | g2210.t1 | integral component of membrane [GO:0016021]; mitochondrion [GO:0005739]; pyrimidine nucleotide transmembrane transporter activity [GO:0015218]; divalent metal ion transport [GO:0070838]; mitochondrial genome maintenance [GO:0000002]; regulation of mitochondrial membrane potential [GO:0051881] |
| <b>sensor kinase</b>                        | g3166.t1 | ATP binding [GO:0005524]; phosphorelay sensor kinase activity [GO:0000155]                                                                                                                                                                                                                            |
|                                             | g4634.t1 | histidine phosphotransfer kinase activity [GO:0009927]; osmosensor activity [GO:0005034]; phosphorelay sensor kinase activity [GO:0000155]                                                                                                                                                            |
| <b>Arsenic</b>                              | K01551   | arsA; arsenite/tail-anchored protein-transporting ATPase                                                                                                                                                                                                                                              |

|                   |          |                                                                                                                                                                                                                                                                                                                                                                                                                                                                                                                                                                                                                             |
|-------------------|----------|-----------------------------------------------------------------------------------------------------------------------------------------------------------------------------------------------------------------------------------------------------------------------------------------------------------------------------------------------------------------------------------------------------------------------------------------------------------------------------------------------------------------------------------------------------------------------------------------------------------------------------|
|                   |          | [EC:7.3.2.7 7.3.-.-]                                                                                                                                                                                                                                                                                                                                                                                                                                                                                                                                                                                                        |
|                   | K01551   | arsA; arsenite/tail-anchored protein-transporting ATPase<br>[EC:7.3.2.7 7.3.-.-]                                                                                                                                                                                                                                                                                                                                                                                                                                                                                                                                            |
|                   | K03325   | ACR3; arsenite transporter                                                                                                                                                                                                                                                                                                                                                                                                                                                                                                                                                                                                  |
|                   | K03325   | ACR3; arsenite transporter                                                                                                                                                                                                                                                                                                                                                                                                                                                                                                                                                                                                  |
|                   | K03325   | ACR3; arsenite transporter                                                                                                                                                                                                                                                                                                                                                                                                                                                                                                                                                                                                  |
|                   |          |                                                                                                                                                                                                                                                                                                                                                                                                                                                                                                                                                                                                                             |
|                   |          |                                                                                                                                                                                                                                                                                                                                                                                                                                                                                                                                                                                                                             |
| <b>Copper</b>     | K19791   | FET3_5; iron transport multicopper oxidase                                                                                                                                                                                                                                                                                                                                                                                                                                                                                                                                                                                  |
|                   | K19791   | FET3_5; iron transport multicopper oxidase                                                                                                                                                                                                                                                                                                                                                                                                                                                                                                                                                                                  |
|                   | K19791   | FET3_5; iron transport multicopper oxidase                                                                                                                                                                                                                                                                                                                                                                                                                                                                                                                                                                                  |
|                   | K14686   | SLC31A1; solute carrier family 31 (copper transporter), member 1                                                                                                                                                                                                                                                                                                                                                                                                                                                                                                                                                            |
|                   | K19791   | FET3_5; iron transport multicopper oxidase                                                                                                                                                                                                                                                                                                                                                                                                                                                                                                                                                                                  |
|                   |          |                                                                                                                                                                                                                                                                                                                                                                                                                                                                                                                                                                                                                             |
| <b>Cobalt</b>     | g1946.t1 | cellular cobalt ion homeostasis [GO:0006877]; cellular manganese ion homeostasis [GO:0030026]; cobalt ion transport [GO:0006824]; manganese ion transport [GO:0006828]                                                                                                                                                                                                                                                                                                                                                                                                                                                      |
|                   | g3821.t1 | cellular cobalt ion homeostasis [GO:0006877]; cellular detoxification of cadmium ion [GO:0098849]; cellular zinc ion homeostasis [GO:0006882]; zinc ion import into endoplasmic reticulum [GO:0140209]                                                                                                                                                                                                                                                                                                                                                                                                                      |
|                   |          |                                                                                                                                                                                                                                                                                                                                                                                                                                                                                                                                                                                                                             |
| <b>Mercury</b>    | g3176.t1 | SCF ubiquitin ligase complex [GO:0019005]; cellular response to methylmercury [GO:0071406]; SCF-dependent proteasomal ubiquitin-dependent protein catabolic process [GO:0031146]                                                                                                                                                                                                                                                                                                                                                                                                                                            |
|                   |          |                                                                                                                                                                                                                                                                                                                                                                                                                                                                                                                                                                                                                             |
| <b>Molybdenum</b> | g78.t1   | MoCF_biosynth, Probable molybdopterin binding domain                                                                                                                                                                                                                                                                                                                                                                                                                                                                                                                                                                        |
|                   | g78.t1   | MoCF_biosynth, Probable molybdopterin binding domain                                                                                                                                                                                                                                                                                                                                                                                                                                                                                                                                                                        |
|                   | g1469.t1 | Molybdopterin oxidoreductase                                                                                                                                                                                                                                                                                                                                                                                                                                                                                                                                                                                                |
|                   | g1469.t1 | Molybdopterin oxidoreductase                                                                                                                                                                                                                                                                                                                                                                                                                                                                                                                                                                                                |
|                   | g3082.t1 | MoCF_biosynth, Probable molybdopterin binding domain                                                                                                                                                                                                                                                                                                                                                                                                                                                                                                                                                                        |
|                   | g3845.t1 | Mob_synth_C, Molybdenum Cofactor Synthesis C                                                                                                                                                                                                                                                                                                                                                                                                                                                                                                                                                                                |
|                   | g4014.t1 | Oxidored_molyb, Oxidoreductase molybdopterin binding domain                                                                                                                                                                                                                                                                                                                                                                                                                                                                                                                                                                 |
|                   |          |                                                                                                                                                                                                                                                                                                                                                                                                                                                                                                                                                                                                                             |
| <b>Cadmium</b>    | g269.t1  | fungal-type vacuole membrane [GO:0000329]; integral component of membrane [GO:0016021]; ATP binding [GO:0005524]; ATPase activity [GO:0016887]; ATPase-coupled transmembrane transporter activity [GO:0042626]; bilirubin transmembrane transporter activity [GO:0015127]; cadmium ion transmembrane transporter activity [GO:0015086]; vacuole fusion, non-autophagic [GO:0042144]                                                                                                                                                                                                                                         |
|                   | g387.t1  | mitochondrion [GO:0005739]; thioredoxin peroxidase activity [GO:0008379]; cell redox homeostasis [GO:0045454]; cellular response to oxidative stress [GO:0034599]; response to cadmium ion [GO:0046686]                                                                                                                                                                                                                                                                                                                                                                                                                     |
|                   | g859.t1  | Cdc48p-Npl4p-Vms1p AAA ATPase complex [GO:0036266]; cytosol [GO:0005829]; Doa10p ubiquitin ligase complex [GO:0000837]; Hrd1p ubiquitin ligase ERAD-L complex [GO:0000839]; nucleus [GO:0005634]; RQC complex [GO:1990112]; VCP-NPL4-UFD1 AAA ATPase complex [GO:0034098]; ATP binding [GO:0005524]; ATPase activity [GO:0016887]; identical protein binding [GO:0042802]; protein phosphatase regulator activity [GO:0019888]; ubiquitin binding [GO:0043130]; ATP metabolic process [GO:0046034]; cellular protein complex disassembly [GO:0043624]; cytoplasm protein quality control by the ubiquitin-proteasome system |

|  |          |                                                                                                                                                                                                                                                                                                                                                                                                                                                                                                                                                                                                                                                                                                                                                                                                                                                                                                                                                                                                                                                                                                                                                                                                                                                                            |
|--|----------|----------------------------------------------------------------------------------------------------------------------------------------------------------------------------------------------------------------------------------------------------------------------------------------------------------------------------------------------------------------------------------------------------------------------------------------------------------------------------------------------------------------------------------------------------------------------------------------------------------------------------------------------------------------------------------------------------------------------------------------------------------------------------------------------------------------------------------------------------------------------------------------------------------------------------------------------------------------------------------------------------------------------------------------------------------------------------------------------------------------------------------------------------------------------------------------------------------------------------------------------------------------------------|
|  |          | [GO:0071629]; endoplasmic reticulum membrane fusion [GO:0016320]; ER-associated misfolded protein catabolic process [GO:0071712]; mitochondria-associated ubiquitin-dependent protein catabolic process [GO:0072671]; mitotic spindle disassembly [GO:0051228]; negative regulation of telomerase activity [GO:0051974]; nonfunctional rRNA decay [GO:0070651]; nuclear protein quality control by the ubiquitin-proteasome system [GO:0071630]; piecemeal microautophagy of the nucleus [GO:0034727]; positive regulation of histone H2B ubiquitination [GO:2001168]; positive regulation of mitochondrial fusion [GO:0010636]; positive regulation of protein localization to nucleus [GO:1900182]; protein transport to vacuole involved in ubiquitin-dependent protein catabolic process via the multivesicular body sorting pathway [GO:0043328]; retrograde protein transport, ER to cytosol [GO:0030970]; ribophagy [GO:0034517]; ribosome-associated ubiquitin-dependent protein catabolic process [GO:1990116]; SCF complex disassembly in response to cadmium stress [GO:1990171]; sister chromatid biorientation [GO:0031134]; stress-induced homeostatically regulated protein degradation pathway [GO:0120174]; ubiquitin-dependent ERAD pathway [GO:0030433] |
|  | g1517.t1 | cytoplasm [GO:0005737]; adenylosuccinate synthase activity [GO:0004019]; GTP binding [GO:0005525]; magnesium ion binding [GO:0000287]; sulfinylpropanyl adenylate synthase [GO:0061483]; 'de novo' AMP biosynthetic process [GO:0044208]; cellular response to cadmium ion [GO:0071276]; fumarate metabolic process [GO:0006106]                                                                                                                                                                                                                                                                                                                                                                                                                                                                                                                                                                                                                                                                                                                                                                                                                                                                                                                                           |
|  | g2030.t1 | integral component of membrane [GO:0016021]; plasma membrane [GO:0005886]; metal ion transmembrane transporter activity [GO:0046873]; solute:proton symporter activity [GO:0015295]; cadmium ion transport [GO:0015691]; cellular cadmium ion homeostasis [GO:0006876]; cellular copper ion homeostasis [GO:0006878]; cellular manganese ion homeostasis [GO:0030026]; copper ion transport [GO:0006825]; iron ion transport [GO:0006826]; manganese ion transport [GO:0006828]                                                                                                                                                                                                                                                                                                                                                                                                                                                                                                                                                                                                                                                                                                                                                                                            |
|  | g2030.t1 | integral component of membrane [GO:0016021]; plasma membrane [GO:0005886]; metal ion transmembrane transporter activity [GO:0046873]; solute:proton symporter activity [GO:0015295]; cadmium ion transport [GO:0015691]; cellular cadmium ion homeostasis [GO:0006876]; cellular copper ion homeostasis [GO:0006878]; cellular manganese ion homeostasis [GO:0030026]; copper ion transport [GO:0006825]; iron ion transport [GO:0006826]; manganese ion transport [GO:0006828]                                                                                                                                                                                                                                                                                                                                                                                                                                                                                                                                                                                                                                                                                                                                                                                            |
|  | g2626.t1 | fungal-type vacuole membrane [GO:0000329]; integral component of membrane [GO:0016021]; ATP binding [GO:0005524]; ATPase activity [GO:0016887]; ATPase-coupled glutathione S-conjugate transmembrane transporter activity [GO:0015431]; ATPase-coupled phytochelatin transmembrane transporter activity [GO:0044604]; ATPase-coupled transmembrane transporter activity [GO:0042626]; bilirubin transmembrane transporter activity [GO:0015127]; cell redox homeostasis [GO:0045454]; cellular detoxification of cadmium ion [GO:0098849]; glutathione metabolic process [GO:0006749]; glutathione transmembrane import into vacuole [GO:0071996]; phytochelatin 2 import into vacuole [GO:0036246]; vacuole fusion, non-autophagic [GO:0042144]                                                                                                                                                                                                                                                                                                                                                                                                                                                                                                                           |
|  | g3821.t1 | endoplasmic reticulum membrane [GO:0005789]; fungal-type vacuole membrane [GO:0000329]; integral component of                                                                                                                                                                                                                                                                                                                                                                                                                                                                                                                                                                                                                                                                                                                                                                                                                                                                                                                                                                                                                                                                                                                                                              |



|  |          |                                                                                                                                                                                                                                                                                                                                                                                                                                                                                                                                                                                                         |
|--|----------|---------------------------------------------------------------------------------------------------------------------------------------------------------------------------------------------------------------------------------------------------------------------------------------------------------------------------------------------------------------------------------------------------------------------------------------------------------------------------------------------------------------------------------------------------------------------------------------------------------|
|  |          | membrane [GO:0016021]; zinc ion transmembrane transporter activity [GO:0005385]; cellular cobalt ion homeostasis [GO:0006877]; cellular detoxification of cadmium ion [GO:0098849]; cellular zinc ion homeostasis [GO:0006882]; zinc ion import into endoplasmic reticulum [GO:0140209]                                                                                                                                                                                                                                                                                                                 |
|  | g4593.t1 | nuclear SCF ubiquitin ligase complex [GO:0043224]; identical protein binding [GO:0042802]; protein binding, bridging [GO:0030674]; ubiquitin binding [GO:0043130]; DNA replication initiation [GO:0006270]; protein polyubiquitination [GO:0000209]; regulation of DNA-dependent DNA replication initiation [GO:0030174]; regulation of transcription involved in G1/S transition of mitotic cell cycle [GO:0000083]; response to arsenic-containing substance [GO:0046685]; response to cadmium ion [GO:0046686]; SCF-dependent proteasomal ubiquitin-dependent protein catabolic process [GO:0031146] |
|  | g6370.t1 | nuclear SCF ubiquitin ligase complex [GO:0043224]; identical protein binding [GO:0042802]; protein binding, bridging [GO:0030674]; ubiquitin binding [GO:0043130]; DNA replication initiation [GO:0006270]; protein polyubiquitination [GO:0000209]; regulation of DNA-dependent DNA replication initiation [GO:0030174]; regulation of transcription involved in G1/S transition of mitotic cell cycle [GO:0000083]; response to arsenic-containing substance [GO:0046685]; response to cadmium ion [GO:0046686]; SCF-dependent proteasomal ubiquitin-dependent protein catabolic process [GO:0031146] |
|  | g6660.t1 | glutathione synthase complex [GO:0036087]; ATP binding [GO:0005524]; glutathione binding [GO:0043295]; glutathione synthase activity [GO:0004363]; magnesium ion binding [GO:0000287]; protein homodimerization activity [GO:0042803]; cellular detoxification of cadmium ion [GO:0098849]; phytochelatin biosynthetic process [GO:0046938]; phytochelatin-metal complex formation [GO:0090423]                                                                                                                                                                                                         |

482

| <b>Aromatic Compounds Degradation cleavage</b> |          |                                                                                                                                               |
|------------------------------------------------|----------|-----------------------------------------------------------------------------------------------------------------------------------------------|
| <b>Catechol</b>                                | g3300.t1 | catechol 1,2-dioxygenase activity [GO:0018576]; ferric iron binding [GO:0008199]; catechol-containing compound metabolic process [GO:0009712] |
|                                                | g3300.t1 | Catechol dioxygenase N terminus                                                                                                               |
| <b>Nitrilase</b>                               | g5205.t1 | nitrilase activity [GO:0000257]; nitrogen compound metabolic process [GO:0006807]                                                             |
|                                                | g6098.t1 | nitrilase activity [GO:0000257]; nitrogen compound metabolic process [GO:0006807]                                                             |
| <b>Phenol hydrolase</b>                        | g3741.t1 | Phenol hydroxylase, C-terminal dimerisation domain                                                                                            |
|                                                | g5896.t1 | Phenol hydroxylase, C-terminal dimerisation domain                                                                                            |
|                                                | g6214.t1 | Phenol hydroxylase, C-terminal dimerisation domain                                                                                            |
| <b>Ferredoxin</b>                              | K22071   | FDX2; ferredoxin-2, mitochondrial                                                                                                             |
|                                                | K22071   | FDX2; ferredoxin-2, mitochondrial                                                                                                             |
| <b>Hydrolase</b>                               | g381.t1  | Putative hydrolase of sodium-potassium ATPase alpha subunit                                                                                   |
|                                                | g381.t1  | haloacid dehalogenase-like hydrolase                                                                                                          |
|                                                | g4374.t1 | Putative hydrolase of sodium-potassium ATPase alpha subunit                                                                                   |
|                                                | g4584.t1 | Putative hydrolase of sodium-potassium ATPase alpha subunit                                                                                   |

|                                                                    |          |                                                                                                                                                                                                                                                                                                                                                                                                                                                                                                                                                                                                                                                                                                                                                |
|--------------------------------------------------------------------|----------|------------------------------------------------------------------------------------------------------------------------------------------------------------------------------------------------------------------------------------------------------------------------------------------------------------------------------------------------------------------------------------------------------------------------------------------------------------------------------------------------------------------------------------------------------------------------------------------------------------------------------------------------------------------------------------------------------------------------------------------------|
|                                                                    | g5107.t1 | Putative hydrolase of sodium-potassium ATPase alpha subunit                                                                                                                                                                                                                                                                                                                                                                                                                                                                                                                                                                                                                                                                                    |
|                                                                    | g6016.t1 | Putative hydrolase of sodium-potassium ATPase alpha subunit                                                                                                                                                                                                                                                                                                                                                                                                                                                                                                                                                                                                                                                                                    |
| <b>Biofilm formation</b>                                           |          |                                                                                                                                                                                                                                                                                                                                                                                                                                                                                                                                                                                                                                                                                                                                                |
| <b>Cell adhesion</b>                                               | g4902.t1 | cell adhesion [GO:0007155]; cellular response to nitrogen starvation [GO:0006995]; establishment of mitotic spindle orientation [GO:0000132]; fungal-type cell wall assembly [GO:0071940]; invasive growth in response to glucose limitation [GO:0001403]; negative regulation of translation [GO:0017148]; positive regulation of filamentous growth of a population of unicellular organisms in response to starvation [GO:1900436]; positive regulation of gluconeogenesis [GO:0045722]; positive regulation of macroautophagy [GO:0016239]; positive regulation of pseudohyphal growth [GO:2000222]; replicative cell aging [GO:0001302]; response to unfolded protein [GO:0006986]; single-species surface biofilm formation [GO:0090606] |
|                                                                    | g5629.t1 | cell adhesion involved in single-species biofilm formation [GO:0043709]; chromatin silencing [GO:0006342]; negative regulation of chromatin silencing at rDNA [GO:0061188]; negative regulation of chromatin silencing at silent mating-type cassette [GO:0061186]; negative regulation of chromatin silencing at telomere [GO:0031939]; negative regulation of transcription by RNA polymerase II [GO:0000122]; positive regulation of transcription from RNA polymerase II promoter in response to heat stress [GO:0061408]; regulation of invasive growth in response to glucose limitation [GO:2000217]                                                                                                                                    |
|                                                                    | g5643.t1 | cell adhesion involved in single-species biofilm formation [GO:0043709]; chromatin silencing [GO:0006342]; negative regulation of chromatin silencing at rDNA [GO:0061188]; negative regulation of chromatin silencing at silent mating-type cassette [GO:0061186]; negative regulation of chromatin silencing at telomere [GO:0031939]; negative regulation of transcription by RNA polymerase II [GO:0000122]; positive regulation of transcription from RNA polymerase II promoter in response to heat stress [GO:0061408]; regulation of invasive growth in response to glucose limitation [GO:2000217]                                                                                                                                    |
| <b>Quorum sensing</b>                                              |          |                                                                                                                                                                                                                                                                                                                                                                                                                                                                                                                                                                                                                                                                                                                                                |
| <b>Homoserine</b>                                                  |          |                                                                                                                                                                                                                                                                                                                                                                                                                                                                                                                                                                                                                                                                                                                                                |
|                                                                    | K17069   | MET17; O-acetylhomoserine/O-acetylserine sulfhydrylase [EC:2.5.1.49 2.5.1.47]                                                                                                                                                                                                                                                                                                                                                                                                                                                                                                                                                                                                                                                                  |
|                                                                    | K17069   | MET17; O-acetylhomoserine/O-acetylserine sulfhydrylase [EC:2.5.1.49 2.5.1.47]                                                                                                                                                                                                                                                                                                                                                                                                                                                                                                                                                                                                                                                                  |
|                                                                    | K17069   | MET17; O-acetylhomoserine/O-acetylserine sulfhydrylase [EC:2.5.1.49 2.5.1.47]                                                                                                                                                                                                                                                                                                                                                                                                                                                                                                                                                                                                                                                                  |
|                                                                    | K17069   | MET17; O-acetylhomoserine/O-acetylserine sulfhydrylase [EC:2.5.1.49 2.5.1.47]                                                                                                                                                                                                                                                                                                                                                                                                                                                                                                                                                                                                                                                                  |
|                                                                    | K00003   | hom; homoserine dehydrogenase [EC:1.1.1.3]                                                                                                                                                                                                                                                                                                                                                                                                                                                                                                                                                                                                                                                                                                     |
|                                                                    | K00003   | hom; homoserine dehydrogenase [EC:1.1.1.3]                                                                                                                                                                                                                                                                                                                                                                                                                                                                                                                                                                                                                                                                                                     |
|                                                                    | K00641   | metX; homoserine O-acetyltransferase/O-succinyltransferase [EC:2.3.1.31 2.3.1.46]                                                                                                                                                                                                                                                                                                                                                                                                                                                                                                                                                                                                                                                              |
|                                                                    | K00641   | metX; homoserine O-acetyltransferase/O-succinyltransferase [EC:2.3.1.31 2.3.1.46]                                                                                                                                                                                                                                                                                                                                                                                                                                                                                                                                                                                                                                                              |
|                                                                    | K00872   | thrB1; homoserine kinase [EC:2.7.1.39]                                                                                                                                                                                                                                                                                                                                                                                                                                                                                                                                                                                                                                                                                                         |
| <b>Biocontrol agents and plant growth regulators related-genes</b> |          |                                                                                                                                                                                                                                                                                                                                                                                                                                                                                                                                                                                                                                                                                                                                                |
|                                                                    | K00135   | gabD; succinate-semialdehyde dehydrogenase / glutarate-semialdehyde dehydrogenase [EC:1.2.1.16 1.2.1.79 1.2.1.20]                                                                                                                                                                                                                                                                                                                                                                                                                                                                                                                                                                                                                              |
|                                                                    | K00135   | gabD; succinate-semialdehyde dehydrogenase / glutarate-                                                                                                                                                                                                                                                                                                                                                                                                                                                                                                                                                                                                                                                                                        |

|  |                          |                                                                                                                                                                                         |
|--|--------------------------|-----------------------------------------------------------------------------------------------------------------------------------------------------------------------------------------|
|  |                          | semialdehyde dehydrogenase [EC:1.2.1.16 1.2.1.79 1.2.1.20]                                                                                                                              |
|  | K00135                   | gabD; succinate-semialdehyde dehydrogenase / glutarate-semialdehyde dehydrogenase [EC:1.2.1.16 1.2.1.79 1.2.1.20]                                                                       |
|  | K00135                   | gabD; succinate-semialdehyde dehydrogenase / glutarate-semialdehyde dehydrogenase [EC:1.2.1.16 1.2.1.79 1.2.1.20]                                                                       |
|  | K00135                   | gabD; succinate-semialdehyde dehydrogenase / glutarate-semialdehyde dehydrogenase [EC:1.2.1.16 1.2.1.79 1.2.1.20]                                                                       |
|  | K00135                   | gabD; succinate-semialdehyde dehydrogenase / glutarate-semialdehyde dehydrogenase [EC:1.2.1.16 1.2.1.79 1.2.1.20]                                                                       |
|  | K00135                   | gabD; succinate-semialdehyde dehydrogenase / glutarate-semialdehyde dehydrogenase [EC:1.2.1.16 1.2.1.79 1.2.1.20]                                                                       |
|  | K00135                   | gabD; succinate-semialdehyde dehydrogenase / glutarate-semialdehyde dehydrogenase [EC:1.2.1.16 1.2.1.79 1.2.1.20]                                                                       |
|  | K00135                   | gabD; succinate-semialdehyde dehydrogenase / glutarate-semialdehyde dehydrogenase [EC:1.2.1.16 1.2.1.79 1.2.1.20]                                                                       |
|  | K00135                   | gabD; succinate-semialdehyde dehydrogenase / glutarate-semialdehyde dehydrogenase [EC:1.2.1.16 1.2.1.79 1.2.1.20]                                                                       |
|  | K01657                   | trpE; anthranilate synthase component I [EC:4.1.3.27]                                                                                                                                   |
|  | g2983.t1                 | Isochorismatase                                                                                                                                                                         |
|  | g4122.t1                 | Isochorismatase                                                                                                                                                                         |
|  | g1968.t1                 | 3-hydroxyanthranilate 3,4-dioxygenase (EC 1.13.11.6) (3-hydroxyanthranilate oxygenase) (3-HAO) (3-hydroxyanthranilic acid dioxygenase) (HAD) (Biosynthesis of nicotinic acid protein 1) |
|  | scf718000000928.g1968.t1 | 00380 Tryptophan metabolism                                                                                                                                                             |

483

484

485

## Figures

486

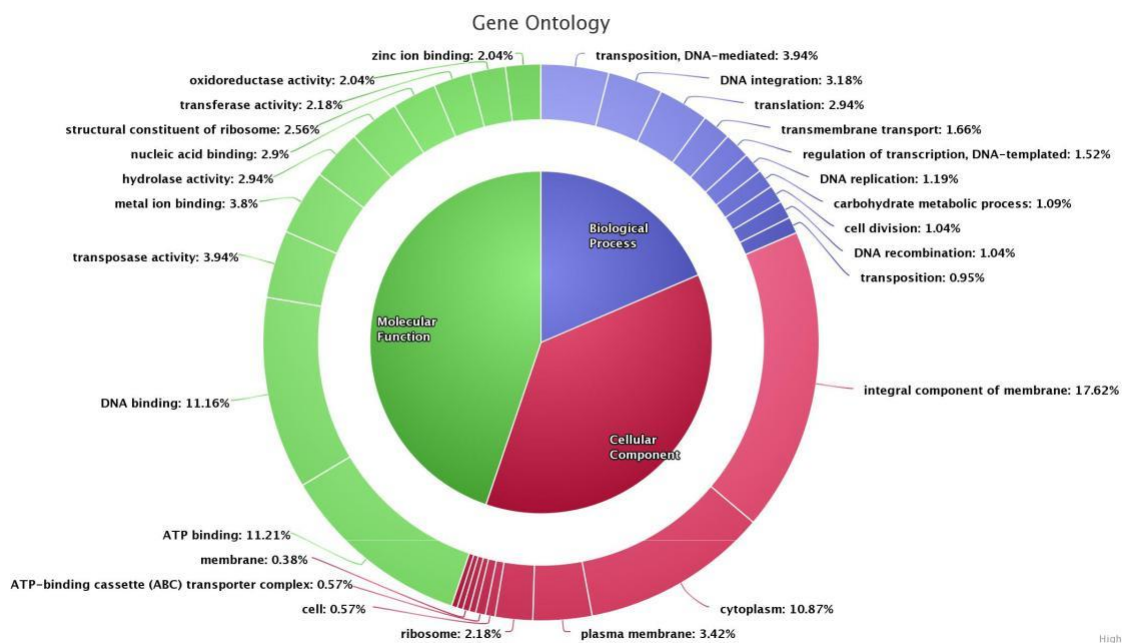

487

488

489

490

491

Figure 1. GO Annotation graph

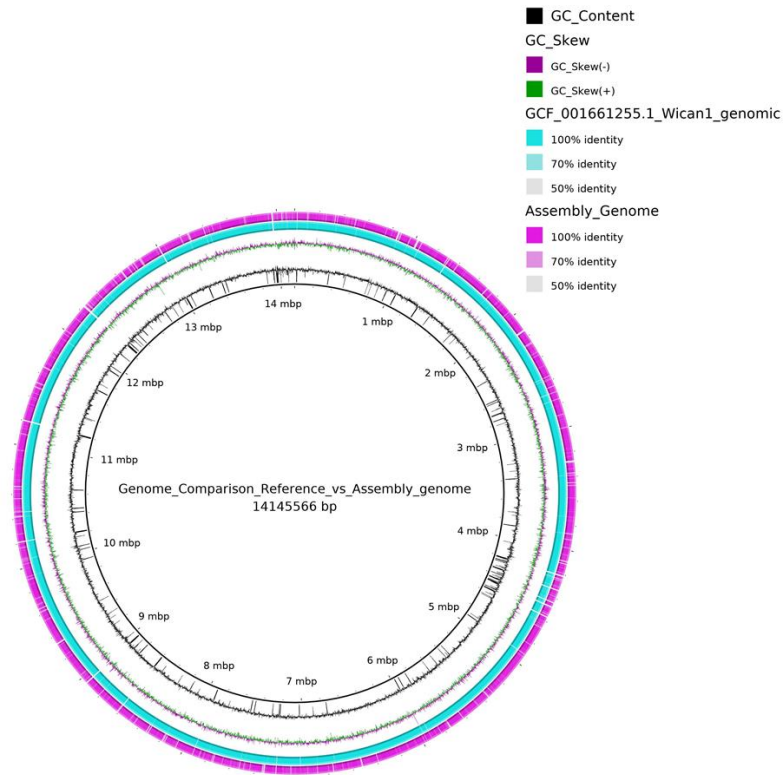

492  
493  
494  
495  
496

**Figure 2.** Genome comparison of reference (NRRL Y-366-8) and assembled genome (MSD1)

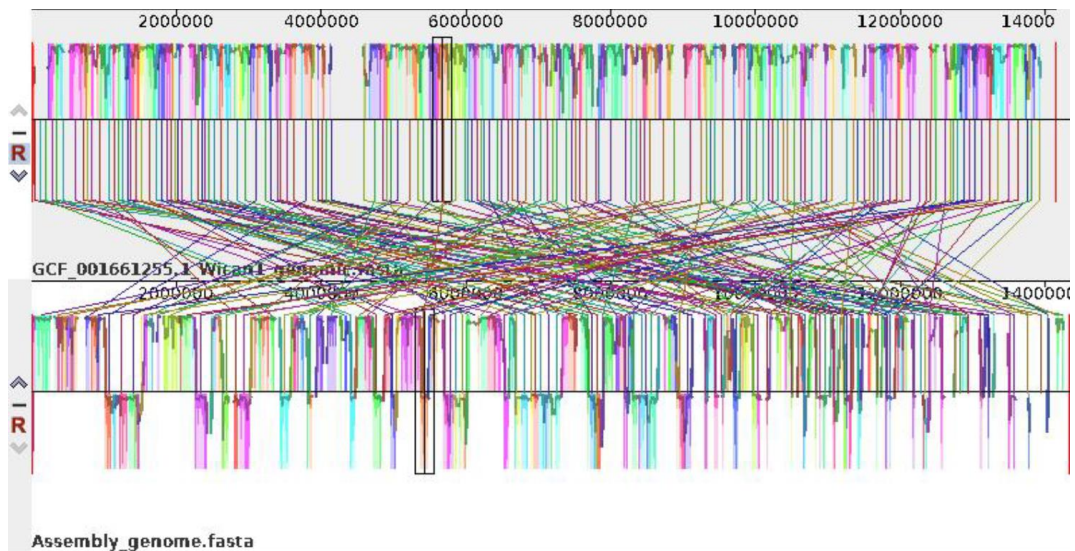

497  
498  
499  
500  
501  
502  
503  
504  
505

**Figure 3.** Synteny map of reference (NRRL Y-366-8) and assemble genome (MSD1)



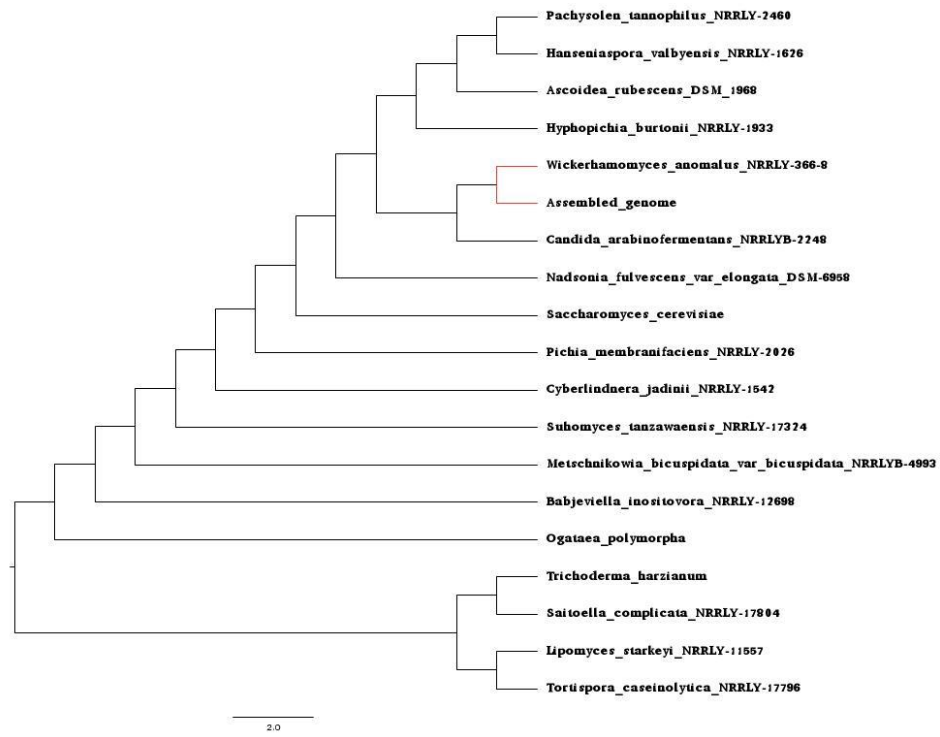

506

507

508

509

510

**Figure 4.** Phylogenetic tree visualizing the comparative genome analysis of MSD1 (Assembled genome) along with other fungal and yeast taxa.

**Table1.** Illumina Read Statistics

| Sample                             | Read Count             |
|------------------------------------|------------------------|
| Total raw reads (in million)       | 6713813 (Read1, Read2) |
| Total processed reads (in million) | 6417015(Read1, Read2)  |

**Table2.** Nanopore Read Statistics

| Parameters                          | Read Stat |
|-------------------------------------|-----------|
| Reads Generated                     | 374070    |
| Maximum Read Length                 | 61005     |
| Minimum Read Length                 | 94        |
| Average Read Length                 | 1177.6    |
| Median Read Length                  | 2311      |
| Total Reads Length                  | 440506966 |
| Total Number of Non-ATGC Characters | 0         |
| Percentage of Non-ATGC Characters   | 0         |
| Reads >= 100 bp                     | 374067    |
| Reads >= 200 bp                     | 372318    |
| Reads >= 500 bp                     | 241259    |
| Reads >= 1 Kbp                      | 125627    |
| Reads >= 10 Kbp                     | 1861      |
| N50 value                           | 1847      |

**Table 3.** Assembly statistics

| Parameter                           | Statistical data |
|-------------------------------------|------------------|
| Contigs Generated                   | 289              |
| Maximum Contig Length               | 275125           |
| Minimum Contig Length               | 3374             |
| Average Contig Length               | 49645.9          |
| Median Contig Length                | 51021            |
| Total Contigs Length                | 14347675         |
| Total Number of Non-ATGC Characters | 0                |
| Percentage of Non-ATGC Characters   | 0                |
| Contigs >= 1 Kbp                    | 289              |
| Contigs >= 10 Kbp                   | 259              |
| N50 value                           | 83236            |

| <b>Table 4. Genes related to Plant Growth Promoting traits that are annotated to be present in <i>Wickerhamomyces anomalus</i> strain MSD1</b> |                           |                                                                                                                                                                                                                                                                                                                                    |
|------------------------------------------------------------------------------------------------------------------------------------------------|---------------------------|------------------------------------------------------------------------------------------------------------------------------------------------------------------------------------------------------------------------------------------------------------------------------------------------------------------------------------|
|                                                                                                                                                | <b>Gene or protein ID</b> | <b>Gene Annotation</b>                                                                                                                                                                                                                                                                                                             |
| <b>Indole-3-Acetic acid</b>                                                                                                                    | K01426                    | Amidase                                                                                                                                                                                                                                                                                                                            |
|                                                                                                                                                | K00128                    | Aldehyde dehydrogenase                                                                                                                                                                                                                                                                                                             |
|                                                                                                                                                | K01568                    | pyruvate decarboxylase                                                                                                                                                                                                                                                                                                             |
| <b>GABA production</b>                                                                                                                         |                           |                                                                                                                                                                                                                                                                                                                                    |
| <b><i>gabD</i></b>                                                                                                                             | g6155.t1                  | succinate-semialdehyde dehydrogenase (NAD <sup>+</sup> ) activity [GO:0004777]; succinate-semialdehyde dehydrogenase [NAD(P) <sup>+</sup> ] activity [GO:0009013]; cellular response to oxidative stress [GO:0034599]; gamma-aminobutyric acid catabolic process [GO:0009450]; glutamate decarboxylation to succinate [GO:0006540] |
| <b><i>gabT</i></b>                                                                                                                             | g4127.t1                  | cytosol [GO:0005829]; 4-aminobutyrate transaminase activity [GO:0003867]; pyridoxal phosphate binding [GO:0030170]; gamma-aminobutyric acid catabolic process [GO:0009450]                                                                                                                                                         |
|                                                                                                                                                | g5717.t1                  | cytosol [GO:0005829]; 4-aminobutyrate transaminase activity [GO:0003867]; pyridoxal phosphate binding [GO:0030170]; gamma-aminobutyric acid catabolic process [GO:0009450]                                                                                                                                                         |
| <b>Antimicrobial</b>                                                                                                                           |                           |                                                                                                                                                                                                                                                                                                                                    |
| <b>Phenazine</b>                                                                                                                               | g6439.t1                  | Phenazine biosynthesis-like protein                                                                                                                                                                                                                                                                                                |
| <b>Acetoin and 2,3 butanediol synthesis</b>                                                                                                    | K01653                    | Acetolactate synthase 1                                                                                                                                                                                                                                                                                                            |
|                                                                                                                                                | K01652                    | Acetolactate synthase                                                                                                                                                                                                                                                                                                              |
|                                                                                                                                                | K00004                    | BDH; (R,R)-butanediol dehydrogenase / meso-butanediol dehydrogenase / diacetyl reductase [EC:1.1.1.4 1.1.1.-1.1.1.303]                                                                                                                                                                                                             |
|                                                                                                                                                |                           |                                                                                                                                                                                                                                                                                                                                    |
| <b>Phosphate</b>                                                                                                                               | K08176                    | PHO84; MFS transporter, PHS family, inorganic phosphate transporter                                                                                                                                                                                                                                                                |
|                                                                                                                                                | K14430                    | PHO87_91; phosphate transporter                                                                                                                                                                                                                                                                                                    |
|                                                                                                                                                | K15108                    | SLC25A19; solute carrier family 25 (mitochondrial thiamine pyrophosphate transporter), member 19                                                                                                                                                                                                                                   |
|                                                                                                                                                | K14684                    | SLC25A23S; solute carrier family 25 (mitochondrial phosphate transporter), member 23/24/25/41                                                                                                                                                                                                                                      |
|                                                                                                                                                | K15102                    | SLC25A3; solute carrier family 25 (mitochondrial phosphate transporter), member 3                                                                                                                                                                                                                                                  |
| <b>Antimicrobial compound</b>                                                                                                                  |                           |                                                                                                                                                                                                                                                                                                                                    |
| <b>Chitinase production</b>                                                                                                                    | K01183                    | Putative chitinase II                                                                                                                                                                                                                                                                                                              |
| <b>GABA</b>                                                                                                                                    | K00135                    | succinate-semialdehyde dehydrogenase                                                                                                                                                                                                                                                                                               |
| <b>Other PGPR fitness conferring genes</b>                                                                                                     |                           |                                                                                                                                                                                                                                                                                                                                    |
|                                                                                                                                                | K01480                    | speB; agmatinase                                                                                                                                                                                                                                                                                                                   |

|                                                  |          |                                                                                                                                                                                                                                                                                 |
|--------------------------------------------------|----------|---------------------------------------------------------------------------------------------------------------------------------------------------------------------------------------------------------------------------------------------------------------------------------|
|                                                  | K00797   | speE; spermidine synthase                                                                                                                                                                                                                                                       |
|                                                  | K00802   | SMS; spermine synthase [EC:2.5.1.22]                                                                                                                                                                                                                                            |
|                                                  |          |                                                                                                                                                                                                                                                                                 |
| <b>Resistance to antifungal drugs</b>            | K03327   | TC.MATE; multidrug resistance protein, MATE family                                                                                                                                                                                                                              |
|                                                  | K08157   | TPO1; MFS transporter, DHA1 family, multidrug resistance protein                                                                                                                                                                                                                |
|                                                  | K08165   | ATR1; MFS transporter, DHA2 family, multidrug resistance protein                                                                                                                                                                                                                |
|                                                  | K08158   | MDR1; MFS transporter, DHA1 family, multidrug resistance protein                                                                                                                                                                                                                |
| <b>Siderophore production (Iron homeostasis)</b> |          |                                                                                                                                                                                                                                                                                 |
|                                                  | g2983.t1 | catalytic activity [GO:0003824]                                                                                                                                                                                                                                                 |
|                                                  | g4122.t1 | nicotinamidase activity [GO:0008936]                                                                                                                                                                                                                                            |
|                                                  | K08197   | ARN; MFS transporter, SIT family, siderophore-iron:H+ symporter                                                                                                                                                                                                                 |
|                                                  | K23503   | SFXN5; sideroflexin-5                                                                                                                                                                                                                                                           |
|                                                  |          |                                                                                                                                                                                                                                                                                 |
| <b>Fe transport</b>                              | K07243   | FTR; high-affinity iron transporter                                                                                                                                                                                                                                             |
|                                                  | K19791   | FET3_5; iron transport multicopper oxidase                                                                                                                                                                                                                                      |
|                                                  | K12346   | SMF; metal iron transporter                                                                                                                                                                                                                                                     |
|                                                  | K22736   | VIT; vacuolar iron transporter family protein                                                                                                                                                                                                                                   |
|                                                  | K07243   | FTR; high-affinity iron transporter                                                                                                                                                                                                                                             |
|                                                  | K15113   | SLC25A28_37; solute carrier family 25 (mitochondrial iron transporter), member 28/37                                                                                                                                                                                            |
|                                                  | K02304   | MET8; precorrin-2 dehydrogenase / sirohydrochlorin ferrocyclase [EC:1.3.1.76 4.99.1.4]                                                                                                                                                                                          |
|                                                  | K01772   | hemH; protoporphyrin/coproporphyrin ferrocyclase [EC:4.99.1.1 4.99.1.9]                                                                                                                                                                                                         |
|                                                  |          |                                                                                                                                                                                                                                                                                 |
| <b>Sulfur metabolism</b>                         | g1937.t1 | Sulfate adenylyltransferase (EC 2.7.7.4) (ATP-sulfurylase) (Sulfate adenylyl transferase) (SAT)                                                                                                                                                                                 |
|                                                  | g5561.t1 | Adenylyl-sulfate kinase (EC 2.7.1.25)                                                                                                                                                                                                                                           |
|                                                  | g6660.t1 | Glutathione synthetase (GSH-S) (EC 6.3.2.3)                                                                                                                                                                                                                                     |
|                                                  |          |                                                                                                                                                                                                                                                                                 |
| <b>Potassium</b>                                 | g381.t1  | Putative hydrolase of sodium-potassium ATPase alpha subunit                                                                                                                                                                                                                     |
|                                                  | g2155.t1 | K <sup>+</sup> potassium transporter                                                                                                                                                                                                                                            |
|                                                  | g4374.t1 | Putative hydrolase of sodium-potassium ATPase alpha subunit                                                                                                                                                                                                                     |
|                                                  | g139.t1  | potassium ion transport [GO:0006813]; protein insertion into mitochondrial inner membrane from matrix [GO:0032979]; proton transmembrane transport [GO:1902600]                                                                                                                 |
|                                                  | g1052.t1 | cellular potassium ion homeostasis [GO:0030007]; positive regulation of mitochondrial translation [GO:0070131]; potassium ion transport [GO:0006813]; protein insertion into mitochondrial inner membrane from matrix [GO:0032979]; proton transmembrane transport [GO:1902600] |

|                                                                     |          |                                                                                                                                                                 |
|---------------------------------------------------------------------|----------|-----------------------------------------------------------------------------------------------------------------------------------------------------------------|
|                                                                     | g1718.t1 | potassium ion transport [GO:0006813]; protein insertion into mitochondrial inner membrane from matrix [GO:0032979]; proton transmembrane transport [GO:1902600] |
| <b>Zinc transport</b>                                               | K14709   | SLC39A1_2_3; solute carrier family 39 (zinc transporter), member 1/2/3                                                                                          |
|                                                                     | K14688   | SLC30A1; solute carrier family 30 (zinc transporter), member 1                                                                                                  |
|                                                                     | K14713   | SLC39A7; solute carrier family 39 (zinc transporter), member 7                                                                                                  |
|                                                                     | K07238   | TC.ZIP; zinc transporter, ZIP family                                                                                                                            |
|                                                                     | K14692   | SLC30A5_7; solute carrier family 30 (zinc transporter), member 5/7                                                                                              |
| <b>Resistance to oxidative stress</b>                               |          |                                                                                                                                                                 |
| <b>Peroxidase</b>                                                   | K00432   | gpx; glutathione peroxidase                                                                                                                                     |
|                                                                     | K03564   | BCP; peroxiredoxin Q/BCP                                                                                                                                        |
| <b>Catalase</b>                                                     | K03781   | katE; catalase                                                                                                                                                  |
| <b>superoxide dismutase</b>                                         | K04564   | SOD2; superoxide dismutase, Fe-Mn family                                                                                                                        |
|                                                                     | K04565   | SOD1; superoxide dismutase, Cu-Zn family                                                                                                                        |
| <b>glutathione S-transferase</b>                                    | K00799   | GST; glutathione S-transferase                                                                                                                                  |
| <b>Hydroperoxidase</b>                                              | K03386   | PRDX2_4; peroxiredoxin (alkyl hydroperoxide reductase subunit C)                                                                                                |
| <b>Heat shock</b>                                                   | K03687   | GRPE; molecular chaperone GrpE                                                                                                                                  |
|                                                                     | K03686   | dnaJ; molecular chaperone DnaJ                                                                                                                                  |
|                                                                     | K04043   | dnaK; molecular chaperone DnaK                                                                                                                                  |
| <b>Rhodanese</b>                                                    | K11996   | MOCS3; adenylyltransferase and sulfurtransferase [EC:2.7.7.80 2.8.1.11]                                                                                         |
| <b>Genes involved in the N cycle</b>                                |          |                                                                                                                                                                 |
| <b>Nitrogenase complex</b>                                          | K04487   | iscS; cysteine desulfurase [EC:2.8.1.7]                                                                                                                         |
| <b>Genes involved in salt tolerance</b>                             |          |                                                                                                                                                                 |
| <b>Trehalose Metabolism</b>                                         | K16055   | TPS; trehalose 6-phosphate synthase/phosphatase [EC:2.4.1.15 3.1.3.12]                                                                                          |
|                                                                     | K22337   | TSL1; trehalose 6-phosphate synthase complex regulatory subunit                                                                                                 |
|                                                                     | K00697   | otsA; trehalose 6-phosphate synthase [EC:2.4.1.15 2.4.1.347]                                                                                                    |
|                                                                     | K01194   | TREH; alpha,alpha-trehalase [EC:3.2.1.28]                                                                                                                       |
| <b>Genes involved in Na<sup>+</sup> and K<sup>+</sup> transport</b> |          |                                                                                                                                                                 |
|                                                                     | K03316   | TC.CPA1; monovalent cation:H <sup>+</sup> antiporter, CPA1 family                                                                                               |
|                                                                     | K01507   | ppa; inorganic pyrophosphatase [EC:3.6.1.1]                                                                                                                     |



| <b>Genes involved in pH wide adaptation</b> |          |                                                                                                                                                                                                                                                                                                       |
|---------------------------------------------|----------|-------------------------------------------------------------------------------------------------------------------------------------------------------------------------------------------------------------------------------------------------------------------------------------------------------|
| <b>Acid expressed</b>                       | K05389   | KCNKF; potassium channel subfamily K, other eukaryote                                                                                                                                                                                                                                                 |
|                                             | K14429   | SLC12A9; solute carrier family 12 (potassium/chloride transporters), member 9                                                                                                                                                                                                                         |
|                                             | K13754   | SLC24A6; solute carrier family 24 (sodium/potassium/calcium exchanger), member 6                                                                                                                                                                                                                      |
|                                             | K04078   | groES; chaperonin GroES                                                                                                                                                                                                                                                                               |
|                                             | K04077   | groEL; chaperonin GroEL                                                                                                                                                                                                                                                                               |
|                                             | K04043   | dnaK; molecular chaperone DnaK                                                                                                                                                                                                                                                                        |
|                                             | K03695   | clpB; ATP-dependent Clp protease ATP-binding subunit ClpB                                                                                                                                                                                                                                             |
|                                             | K03544   | clpX; ATP-dependent Clp protease ATP-binding subunit ClpX                                                                                                                                                                                                                                             |
| <b>Alkaline expressed</b>                   | K07300   | chaA; Ca <sup>2+</sup> :H <sup>+</sup> antiporter                                                                                                                                                                                                                                                     |
|                                             | K03316   | TC.CPA1; monovalent cation:H <sup>+</sup> antiporter, CPA1 family                                                                                                                                                                                                                                     |
|                                             | K23541   | TMEM165; Ca <sup>2+</sup> /H <sup>+</sup> antiporter, TMEM165/GDT1 family                                                                                                                                                                                                                             |
|                                             | K03316   | TC.CPA1; monovalent cation:H <sup>+</sup> antiporter, CPA1 family                                                                                                                                                                                                                                     |
|                                             | K08744   | CRLS; cardiolipin synthase (CMP-forming) [EC:2.7.8.41]                                                                                                                                                                                                                                                |
|                                             | K08744   | CRLS; cardiolipin synthase (CMP-forming) [EC:2.7.8.41]                                                                                                                                                                                                                                                |
|                                             | K20498   | DSD1; D-serine ammonia-lyase [EC:4.3.1.18]                                                                                                                                                                                                                                                            |
|                                             | K17989   | SDS; L-serine/L-threonine ammonia-lyase [EC:4.3.1.17 4.3.1.19]                                                                                                                                                                                                                                        |
|                                             |          |                                                                                                                                                                                                                                                                                                       |
| <b>Resistance to heavy metals</b>           |          |                                                                                                                                                                                                                                                                                                       |
| <b>Divalent</b>                             | g2210.t1 | integral component of membrane [GO:0016021]; mitochondrion [GO:0005739]; pyrimidine nucleotide transmembrane transporter activity [GO:0015218]; divalent metal ion transport [GO:0070838]; mitochondrial genome maintenance [GO:0000002]; regulation of mitochondrial membrane potential [GO:0051881] |
|                                             |          |                                                                                                                                                                                                                                                                                                       |
| <b>sensor kinase</b>                        | g3166.t1 | ATP binding [GO:0005524]; phosphorelay sensor kinase activity [GO:0000155]                                                                                                                                                                                                                            |
|                                             | g4634.t1 | histidine phosphotransfer kinase activity [GO:0009927]; osmosensor activity [GO:0005034]; phosphorelay sensor kinase activity [GO:0000155]                                                                                                                                                            |
|                                             |          |                                                                                                                                                                                                                                                                                                       |
| <b>Arsenic</b>                              | K01551   | arsA; arsenite/tail-anchored protein-transporting ATPase [EC:7.3.2.7 7.3.-.-]                                                                                                                                                                                                                         |
|                                             | K01551   | arsA; arsenite/tail-anchored protein-transporting ATPase [EC:7.3.2.7 7.3.-.-]                                                                                                                                                                                                                         |
|                                             | K03325   | ACR3; arsenite transporter                                                                                                                                                                                                                                                                            |
|                                             | K03325   | ACR3; arsenite transporter                                                                                                                                                                                                                                                                            |
|                                             | K03325   | ACR3; arsenite transporter                                                                                                                                                                                                                                                                            |
|                                             |          |                                                                                                                                                                                                                                                                                                       |
|                                             |          |                                                                                                                                                                                                                                                                                                       |
| <b>Copper</b>                               | K19791   | FET3_5; iron transport multicopper oxidase                                                                                                                                                                                                                                                            |
|                                             | K19791   | FET3_5; iron transport multicopper oxidase                                                                                                                                                                                                                                                            |
|                                             | K19791   | FET3_5; iron transport multicopper oxidase                                                                                                                                                                                                                                                            |

|                   |          |                                                                                                                                                                                                                                                                                                                                                                                                                                                                                                                                                                                                                                                                                                             |
|-------------------|----------|-------------------------------------------------------------------------------------------------------------------------------------------------------------------------------------------------------------------------------------------------------------------------------------------------------------------------------------------------------------------------------------------------------------------------------------------------------------------------------------------------------------------------------------------------------------------------------------------------------------------------------------------------------------------------------------------------------------|
|                   | K14686   | SLC31A1; solute carrier family 31 (copper transporter), member 1                                                                                                                                                                                                                                                                                                                                                                                                                                                                                                                                                                                                                                            |
|                   | K19791   | FET3_5; iron transport multicopper oxidase                                                                                                                                                                                                                                                                                                                                                                                                                                                                                                                                                                                                                                                                  |
|                   |          |                                                                                                                                                                                                                                                                                                                                                                                                                                                                                                                                                                                                                                                                                                             |
| <b>Cobalt</b>     | g1946.t1 | cellular cobalt ion homeostasis [GO:0006877]; cellular manganese ion homeostasis [GO:0030026]; cobalt ion transport [GO:0006824]; manganese ion transport [GO:0006828]                                                                                                                                                                                                                                                                                                                                                                                                                                                                                                                                      |
|                   | g3821.t1 | cellular cobalt ion homeostasis [GO:0006877]; cellular detoxification of cadmium ion [GO:0098849]; cellular zinc ion homeostasis [GO:0006882]; zinc ion import into endoplasmic reticulum [GO:0140209]                                                                                                                                                                                                                                                                                                                                                                                                                                                                                                      |
|                   |          |                                                                                                                                                                                                                                                                                                                                                                                                                                                                                                                                                                                                                                                                                                             |
| <b>Mercury</b>    | g3176.t1 | SCF ubiquitin ligase complex [GO:0019005]; cellular response to methylmercury [GO:0071406]; SCF-dependent proteasomal ubiquitin-dependent protein catabolic process [GO:0031146]                                                                                                                                                                                                                                                                                                                                                                                                                                                                                                                            |
|                   |          |                                                                                                                                                                                                                                                                                                                                                                                                                                                                                                                                                                                                                                                                                                             |
| <b>Molybdenum</b> | g78.t1   | MoCF_biosynth, Probable molybdopterin binding domain                                                                                                                                                                                                                                                                                                                                                                                                                                                                                                                                                                                                                                                        |
|                   | g78.t1   | MoCF_biosynth, Probable molybdopterin binding domain                                                                                                                                                                                                                                                                                                                                                                                                                                                                                                                                                                                                                                                        |
|                   | g1469.t1 | Molybdopterin oxidoreductase                                                                                                                                                                                                                                                                                                                                                                                                                                                                                                                                                                                                                                                                                |
|                   | g1469.t1 | Molybdopterin oxidoreductase                                                                                                                                                                                                                                                                                                                                                                                                                                                                                                                                                                                                                                                                                |
|                   | g3082.t1 | MoCF_biosynth, Probable molybdopterin binding domain                                                                                                                                                                                                                                                                                                                                                                                                                                                                                                                                                                                                                                                        |
|                   | g3845.t1 | Mob_synth_C, Molybdenum Cofactor Synthesis C                                                                                                                                                                                                                                                                                                                                                                                                                                                                                                                                                                                                                                                                |
|                   | g4014.t1 | Oxidored_molyb, Oxidoreductase molybdopterin binding domain                                                                                                                                                                                                                                                                                                                                                                                                                                                                                                                                                                                                                                                 |
|                   |          |                                                                                                                                                                                                                                                                                                                                                                                                                                                                                                                                                                                                                                                                                                             |
| <b>Cadmium</b>    | g269.t1  | fungal-type vacuole membrane [GO:0000329]; integral component of membrane [GO:0016021]; ATP binding [GO:0005524]; ATPase activity [GO:0016887]; ATPase-coupled transmembrane transporter activity [GO:0042626]; bilirubin transmembrane transporter activity [GO:0015127]; cadmium ion transmembrane transporter activity [GO:0015086]; vacuole fusion, non-autophagic [GO:0042144]                                                                                                                                                                                                                                                                                                                         |
|                   | g387.t1  | mitochondrion [GO:0005739]; thioredoxin peroxidase activity [GO:0008379]; cell redox homeostasis [GO:0045454]; cellular response to oxidative stress [GO:0034599]; response to cadmium ion [GO:0046686]                                                                                                                                                                                                                                                                                                                                                                                                                                                                                                     |
|                   | g859.t1  | Cdc48p-Npl4p-Vms1p AAA ATPase complex [GO:0036266]; cytosol [GO:0005829]; Doa10p ubiquitin ligase complex [GO:0000837]; Hrd1p ubiquitin ligase ERAD-L complex [GO:0000839]; nucleus [GO:0005634]; RQC complex [GO:1990112]; VCP-NPL4-UFD1 AAA ATPase complex [GO:0034098]; ATP binding [GO:0005524]; ATPase activity [GO:0016887]; identical protein binding [GO:0042802]; protein phosphatase regulator activity [GO:0019888]; ubiquitin binding [GO:0043130]; ATP metabolic process [GO:0046034]; cellular protein complex disassembly [GO:0043624]; cytoplasm protein quality control by the ubiquitin-proteasome system [GO:0071629]; endoplasmic reticulum membrane fusion [GO:0016320]; ER-associated |

|  |          |                                                                                                                                                                                                                                                                                                                                                                                                                                                                                                                                                                                                                                                                                                                                                                                                                                                                                                                                                                                                                                                                                                                                                                                                   |
|--|----------|---------------------------------------------------------------------------------------------------------------------------------------------------------------------------------------------------------------------------------------------------------------------------------------------------------------------------------------------------------------------------------------------------------------------------------------------------------------------------------------------------------------------------------------------------------------------------------------------------------------------------------------------------------------------------------------------------------------------------------------------------------------------------------------------------------------------------------------------------------------------------------------------------------------------------------------------------------------------------------------------------------------------------------------------------------------------------------------------------------------------------------------------------------------------------------------------------|
|  |          | <p>misfolded protein catabolic process [GO:0071712]; mitochondria-associated ubiquitin-dependent protein catabolic process [GO:0072671]; mitotic spindle disassembly [GO:0051228]; negative regulation of telomerase activity [GO:0051974]; nonfunctional rRNA decay [GO:0070651]; nuclear protein quality control by the ubiquitin-proteasome system [GO:0071630]; piecemeal microautophagy of the nucleus [GO:0034727]; positive regulation of histone H2B ubiquitination [GO:2001168]; positive regulation of mitochondrial fusion [GO:0010636]; positive regulation of protein localization to nucleus [GO:1900182]; protein transport to vacuole involved in ubiquitin-dependent protein catabolic process via the multivesicular body sorting pathway [GO:0043328]; retrograde protein transport, ER to cytosol [GO:0030970]; ribophagy [GO:0034517]; ribosome-associated ubiquitin-dependent protein catabolic process [GO:1990116]; SCF complex disassembly in response to cadmium stress [GO:1990171]; sister chromatid biorientation [GO:0031134]; stress-induced homeostatically regulated protein degradation pathway [GO:0120174]; ubiquitin-dependent ERAD pathway [GO:0030433]</p> |
|  | g1517.t1 | <p>cytoplasm [GO:0005737]; adenylosuccinate synthase activity [GO:0004019]; GTP binding [GO:0005525]; magnesium ion binding [GO:0000287]; sulfinylpropanyl adenylate synthase [GO:0061483]; 'de novo' AMP biosynthetic process [GO:0044208]; cellular response to cadmium ion [GO:0071276]; fumarate metabolic process [GO:0006106]</p>                                                                                                                                                                                                                                                                                                                                                                                                                                                                                                                                                                                                                                                                                                                                                                                                                                                           |
|  | g2030.t1 | <p>integral component of membrane [GO:0016021]; plasma membrane [GO:0005886]; metal ion transmembrane transporter activity [GO:0046873]; solute:proton symporter activity [GO:0015295]; cadmium ion transport [GO:0015691]; cellular cadmium ion homeostasis [GO:0006876]; cellular copper ion homeostasis [GO:0006878]; cellular manganese ion homeostasis [GO:0030026]; copper ion transport [GO:0006825]; iron ion transport [GO:0006826]; manganese ion transport [GO:0006828]</p>                                                                                                                                                                                                                                                                                                                                                                                                                                                                                                                                                                                                                                                                                                            |
|  | g2030.t1 | <p>integral component of membrane [GO:0016021]; plasma membrane [GO:0005886]; metal ion transmembrane transporter activity [GO:0046873]; solute:proton symporter activity [GO:0015295]; cadmium ion transport [GO:0015691]; cellular cadmium ion homeostasis [GO:0006876]; cellular copper ion homeostasis [GO:0006878]; cellular manganese ion homeostasis [GO:0030026]; copper ion transport [GO:0006825]; iron ion transport [GO:0006826]; manganese ion transport [GO:0006828]</p>                                                                                                                                                                                                                                                                                                                                                                                                                                                                                                                                                                                                                                                                                                            |
|  | g2626.t1 | <p>fungal-type vacuole membrane [GO:0000329]; integral component of membrane [GO:0016021]; ATP binding [GO:0005524]; ATPase activity [GO:0016887]; ATPase-coupled glutathione S-conjugate transmembrane</p>                                                                                                                                                                                                                                                                                                                                                                                                                                                                                                                                                                                                                                                                                                                                                                                                                                                                                                                                                                                       |

|  |          |                                                                                                                                                                                                                                                                                                                                                                                                                                                                                                                                                                                                         |
|--|----------|---------------------------------------------------------------------------------------------------------------------------------------------------------------------------------------------------------------------------------------------------------------------------------------------------------------------------------------------------------------------------------------------------------------------------------------------------------------------------------------------------------------------------------------------------------------------------------------------------------|
|  |          | transporter activity [GO:0015431]; ATPase-coupled phytochelatin transmembrane transporter activity [GO:0044604]; ATPase-coupled transmembrane transporter activity [GO:0042626]; bilirubin transmembrane transporter activity [GO:0015127]; cell redox homeostasis [GO:0045454]; cellular detoxification of cadmium ion [GO:0098849]; glutathione metabolic process [GO:0006749]; glutathione transmembrane import into vacuole [GO:0071996]; phytochelatin 2 import into vacuole [GO:0036246]; vacuole fusion, non-autophagic [GO:0042144]                                                             |
|  | g3821.t1 | endoplasmic reticulum membrane [GO:0005789]; fungal-type vacuole membrane [GO:0000329]; integral component of membrane [GO:0016021]; zinc ion transmembrane transporter activity [GO:0005385]; cellular cobalt ion homeostasis [GO:0006877]; cellular detoxification of cadmium ion [GO:0098849]; cellular zinc ion homeostasis [GO:0006882]; zinc ion import into endoplasmic reticulum [GO:0140209]                                                                                                                                                                                                   |
|  | g4593.t1 | nuclear SCF ubiquitin ligase complex [GO:0043224]; identical protein binding [GO:0042802]; protein binding, bridging [GO:0030674]; ubiquitin binding [GO:0043130]; DNA replication initiation [GO:0006270]; protein polyubiquitination [GO:0000209]; regulation of DNA-dependent DNA replication initiation [GO:0030174]; regulation of transcription involved in G1/S transition of mitotic cell cycle [GO:0000083]; response to arsenic-containing substance [GO:0046685]; response to cadmium ion [GO:0046686]; SCF-dependent proteasomal ubiquitin-dependent protein catabolic process [GO:0031146] |
|  | g6370.t1 | nuclear SCF ubiquitin ligase complex [GO:0043224]; identical protein binding [GO:0042802]; protein binding, bridging [GO:0030674]; ubiquitin binding [GO:0043130]; DNA replication initiation [GO:0006270]; protein polyubiquitination [GO:0000209]; regulation of DNA-dependent DNA replication initiation [GO:0030174]; regulation of transcription involved in G1/S transition of mitotic cell cycle [GO:0000083]; response to arsenic-containing substance [GO:0046685]; response to cadmium ion [GO:0046686]; SCF-dependent proteasomal ubiquitin-dependent protein catabolic process [GO:0031146] |
|  | g6660.t1 | glutathione synthase complex [GO:0036087]; ATP binding [GO:0005524]; glutathione binding [GO:0043295]; glutathione synthase activity [GO:0004363]; magnesium ion binding [GO:0000287]; protein homodimerization activity [GO:0042803]; cellular detoxification of cadmium ion [GO:0098849]; phytochelatin biosynthetic process [GO:0046938]; phytochelatin-metal complex formation [GO:0090423]                                                                                                                                                                                                         |
|  |          |                                                                                                                                                                                                                                                                                                                                                                                                                                                                                                                                                                                                         |

**Aromatic Compounds Degradation cleavage**

|                          |          |                                                                                                                                                                                                                                                                                                                                                                                                                                                                                                                                                                                                                                                                                                                                                |
|--------------------------|----------|------------------------------------------------------------------------------------------------------------------------------------------------------------------------------------------------------------------------------------------------------------------------------------------------------------------------------------------------------------------------------------------------------------------------------------------------------------------------------------------------------------------------------------------------------------------------------------------------------------------------------------------------------------------------------------------------------------------------------------------------|
| <b>Catechol</b>          | g3300.t1 | catechol 1,2-dioxygenase activity [GO:0018576]; ferric iron binding [GO:0008199]; catechol-containing compound metabolic process [GO:0009712]                                                                                                                                                                                                                                                                                                                                                                                                                                                                                                                                                                                                  |
|                          | g3300.t1 | Catechol dioxygenase N terminus                                                                                                                                                                                                                                                                                                                                                                                                                                                                                                                                                                                                                                                                                                                |
| <b>Nitrilase</b>         | g5205.t1 | nitrilase activity [GO:0000257]; nitrogen compound metabolic process [GO:0006807]                                                                                                                                                                                                                                                                                                                                                                                                                                                                                                                                                                                                                                                              |
|                          | g6098.t1 | nitrilase activity [GO:0000257]; nitrogen compound metabolic process [GO:0006807]                                                                                                                                                                                                                                                                                                                                                                                                                                                                                                                                                                                                                                                              |
| <b>Phenol hydrolase</b>  | g3741.t1 | Phenol hydroxylase, C-terminal dimerisation domain                                                                                                                                                                                                                                                                                                                                                                                                                                                                                                                                                                                                                                                                                             |
|                          | g5896.t1 | Phenol hydroxylase, C-terminal dimerisation domain                                                                                                                                                                                                                                                                                                                                                                                                                                                                                                                                                                                                                                                                                             |
|                          | g6214.t1 | Phenol hydroxylase, C-terminal dimerisation domain                                                                                                                                                                                                                                                                                                                                                                                                                                                                                                                                                                                                                                                                                             |
| <b>Ferredoxin</b>        | K22071   | FDX2; ferredoxin-2, mitochondrial                                                                                                                                                                                                                                                                                                                                                                                                                                                                                                                                                                                                                                                                                                              |
|                          | K22071   | FDX2; ferredoxin-2, mitochondrial                                                                                                                                                                                                                                                                                                                                                                                                                                                                                                                                                                                                                                                                                                              |
| <b>Hydrolase</b>         | g381.t1  | Putative hydrolase of sodium-potassium ATPase alpha subunit                                                                                                                                                                                                                                                                                                                                                                                                                                                                                                                                                                                                                                                                                    |
|                          | g381.t1  | haloacid dehalogenase-like hydrolase                                                                                                                                                                                                                                                                                                                                                                                                                                                                                                                                                                                                                                                                                                           |
|                          | g4374.t1 | Putative hydrolase of sodium-potassium ATPase alpha subunit                                                                                                                                                                                                                                                                                                                                                                                                                                                                                                                                                                                                                                                                                    |
|                          | g4584.t1 | Putative hydrolase of sodium-potassium ATPase alpha subunit                                                                                                                                                                                                                                                                                                                                                                                                                                                                                                                                                                                                                                                                                    |
|                          | g5107.t1 | Putative hydrolase of sodium-potassium ATPase alpha subunit                                                                                                                                                                                                                                                                                                                                                                                                                                                                                                                                                                                                                                                                                    |
|                          | g6016.t1 | Putative hydrolase of sodium-potassium ATPase alpha subunit                                                                                                                                                                                                                                                                                                                                                                                                                                                                                                                                                                                                                                                                                    |
| <b>Biofilm formation</b> |          |                                                                                                                                                                                                                                                                                                                                                                                                                                                                                                                                                                                                                                                                                                                                                |
| <b>Cell adhesion</b>     | g4902.t1 | cell adhesion [GO:0007155]; cellular response to nitrogen starvation [GO:0006995]; establishment of mitotic spindle orientation [GO:0000132]; fungal-type cell wall assembly [GO:0071940]; invasive growth in response to glucose limitation [GO:0001403]; negative regulation of translation [GO:0017148]; positive regulation of filamentous growth of a population of unicellular organisms in response to starvation [GO:1900436]; positive regulation of gluconeogenesis [GO:0045722]; positive regulation of macroautophagy [GO:0016239]; positive regulation of pseudohyphal growth [GO:2000222]; replicative cell aging [GO:0001302]; response to unfolded protein [GO:0006986]; single-species surface biofilm formation [GO:0090606] |
|                          | g5629.t1 | cell adhesion involved in single-species biofilm formation [GO:0043709]; chromatin silencing [GO:0006342]; negative regulation of chromatin silencing at rDNA [GO:0061188]; negative regulation of chromatin silencing at silent mating-type cassette [GO:0061186]; negative regulation of chromatin silencing at telomere [GO:0031939]; negative regulation of transcription by RNA polymerase II                                                                                                                                                                                                                                                                                                                                             |





|  |                                   |                                                                                                                                                                                         |
|--|-----------------------------------|-----------------------------------------------------------------------------------------------------------------------------------------------------------------------------------------|
|  |                                   | 1.2.1.20]                                                                                                                                                                               |
|  | K00135                            | gabD; succinate-semialdehyde dehydrogenase / glutarate-semialdehyde dehydrogenase [EC:1.2.1.16 1.2.1.79 1.2.1.20]                                                                       |
|  | K00135                            | gabD; succinate-semialdehyde dehydrogenase / glutarate-semialdehyde dehydrogenase [EC:1.2.1.16 1.2.1.79 1.2.1.20]                                                                       |
|  | K00135                            | gabD; succinate-semialdehyde dehydrogenase / glutarate-semialdehyde dehydrogenase [EC:1.2.1.16 1.2.1.79 1.2.1.20]                                                                       |
|  | K00135                            | gabD; succinate-semialdehyde dehydrogenase / glutarate-semialdehyde dehydrogenase [EC:1.2.1.16 1.2.1.79 1.2.1.20]                                                                       |
|  | K01657                            | trpE; anthranilate synthase component I [EC:4.1.3.27]                                                                                                                                   |
|  | g2983.t1                          | Isochorismatase                                                                                                                                                                         |
|  | g4122.t1                          | Isochorismatase                                                                                                                                                                         |
|  | g1968.t1                          | 3-hydroxyanthranilate 3,4-dioxygenase (EC 1.13.11.6) (3-hydroxyanthranilate oxygenase) (3-HAO) (3-hydroxyanthranilic acid dioxygenase) (HAD) (Biosynthesis of nicotinic acid protein 1) |
|  | scf7180000<br>000928.g19<br>68.t1 | 00380 Tryptophan metabolism                                                                                                                                                             |



# Gene Ontology

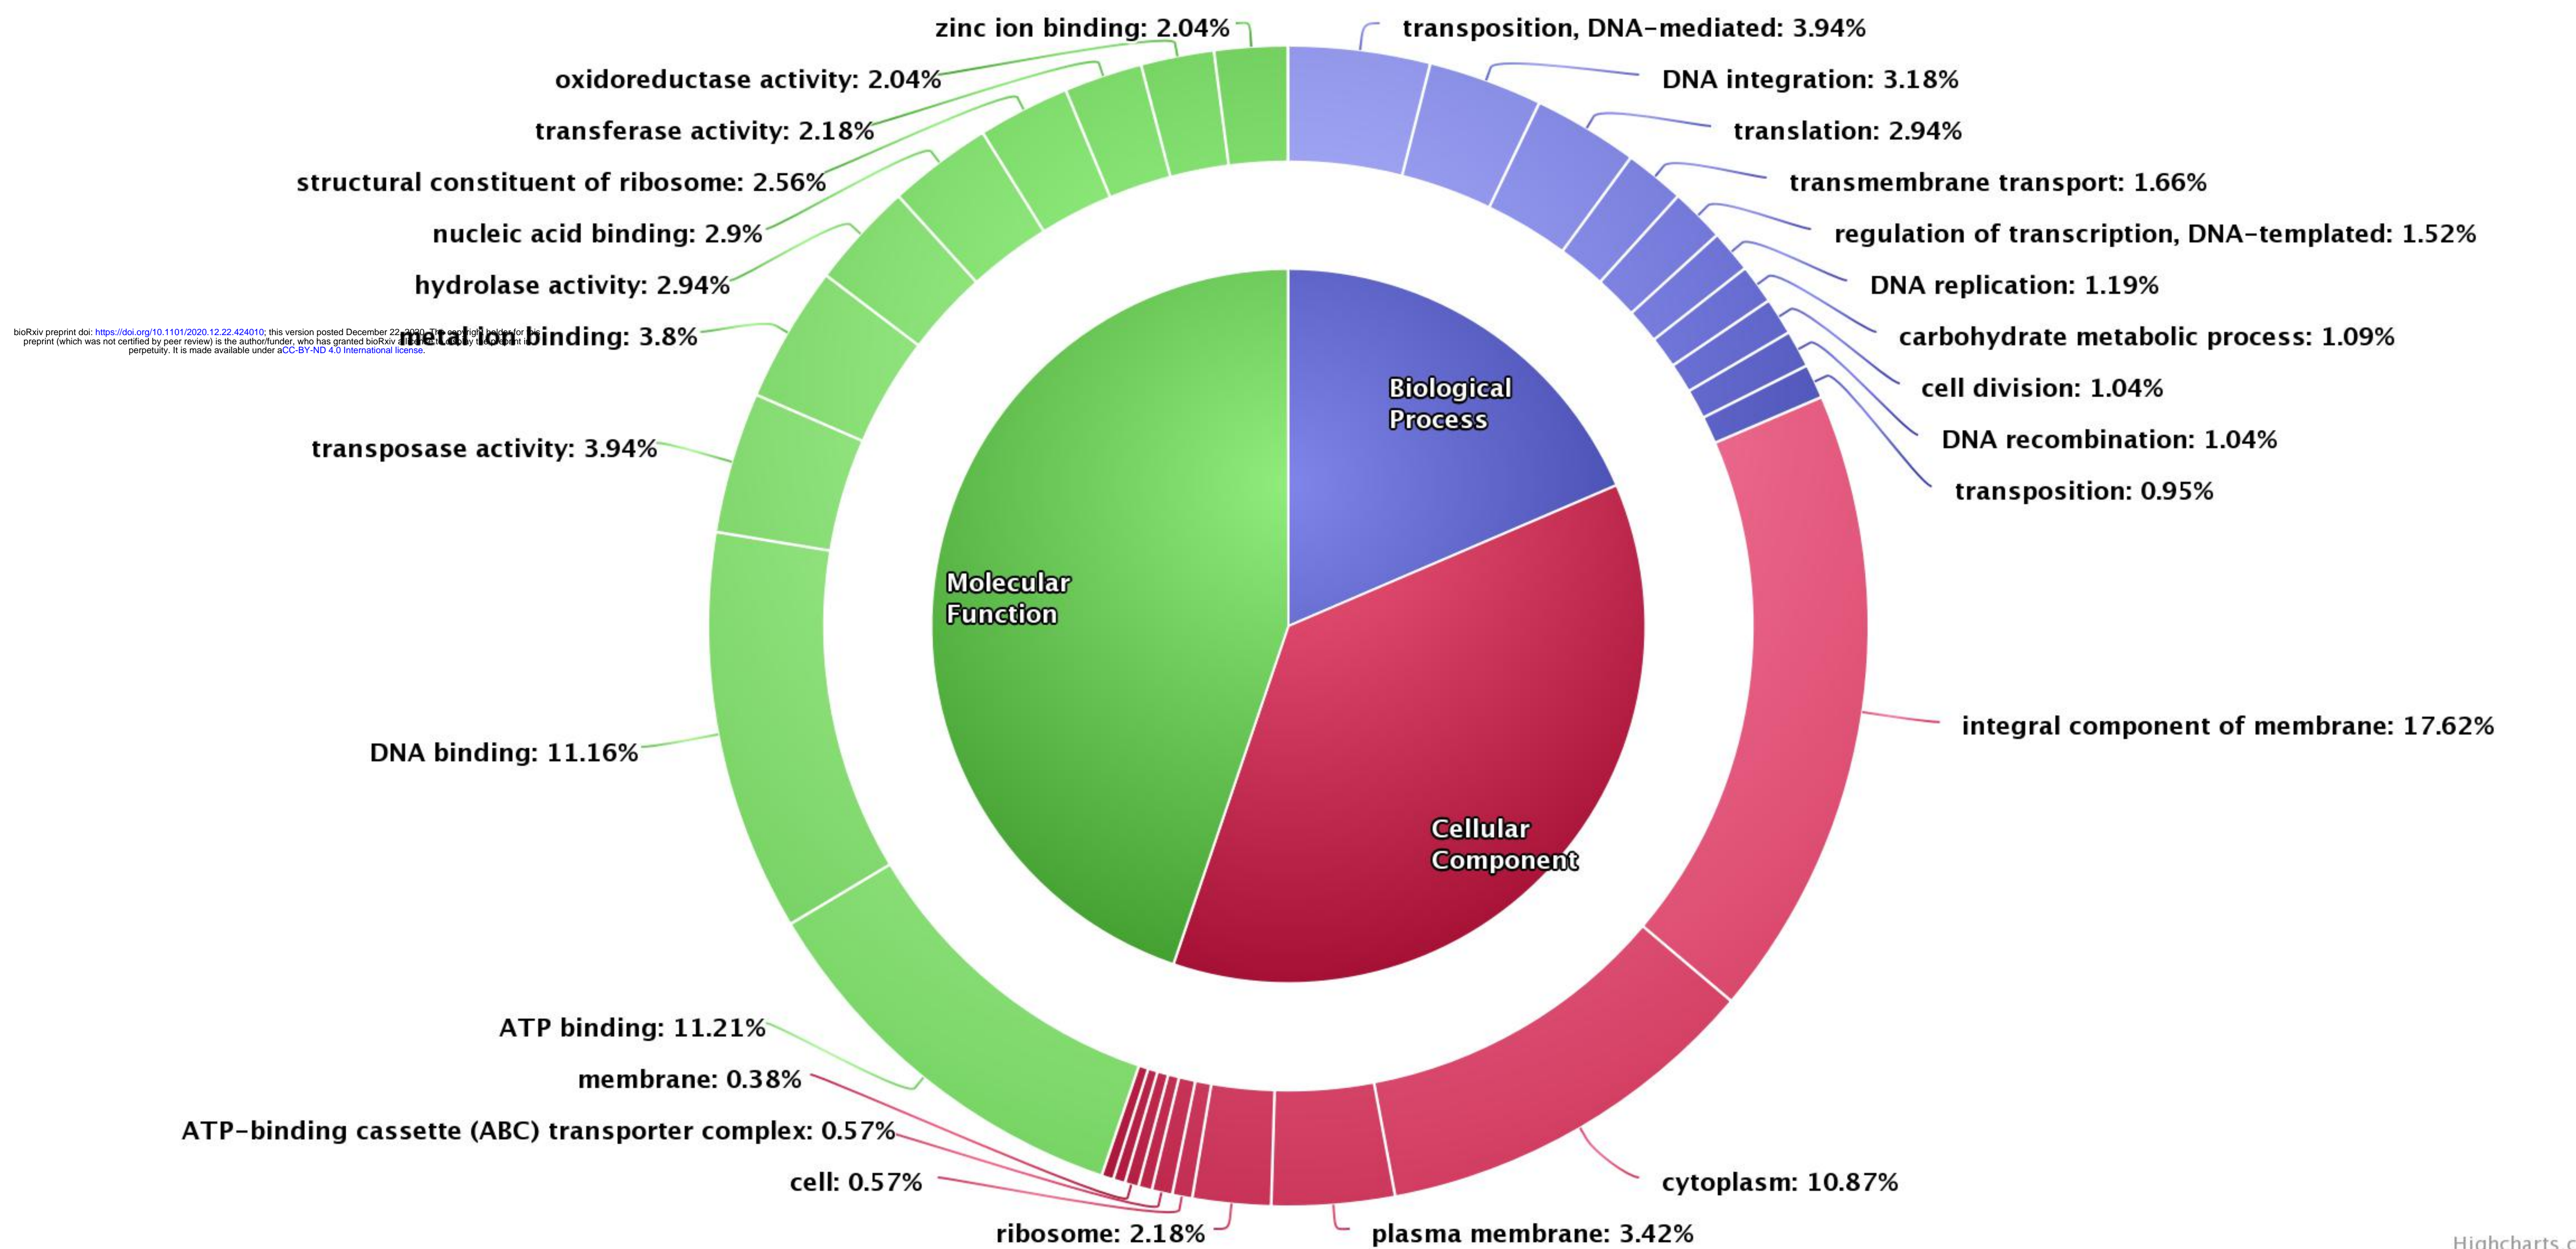



GC\_Content

GC\_Skew

GC\_Skew(-)

GC\_Skew(+)

GCF\_001661255.1\_Wican1\_genomic

100% identity

70% identity

50% identity

Assembly\_Genome

100% identity

70% identity

50% identity

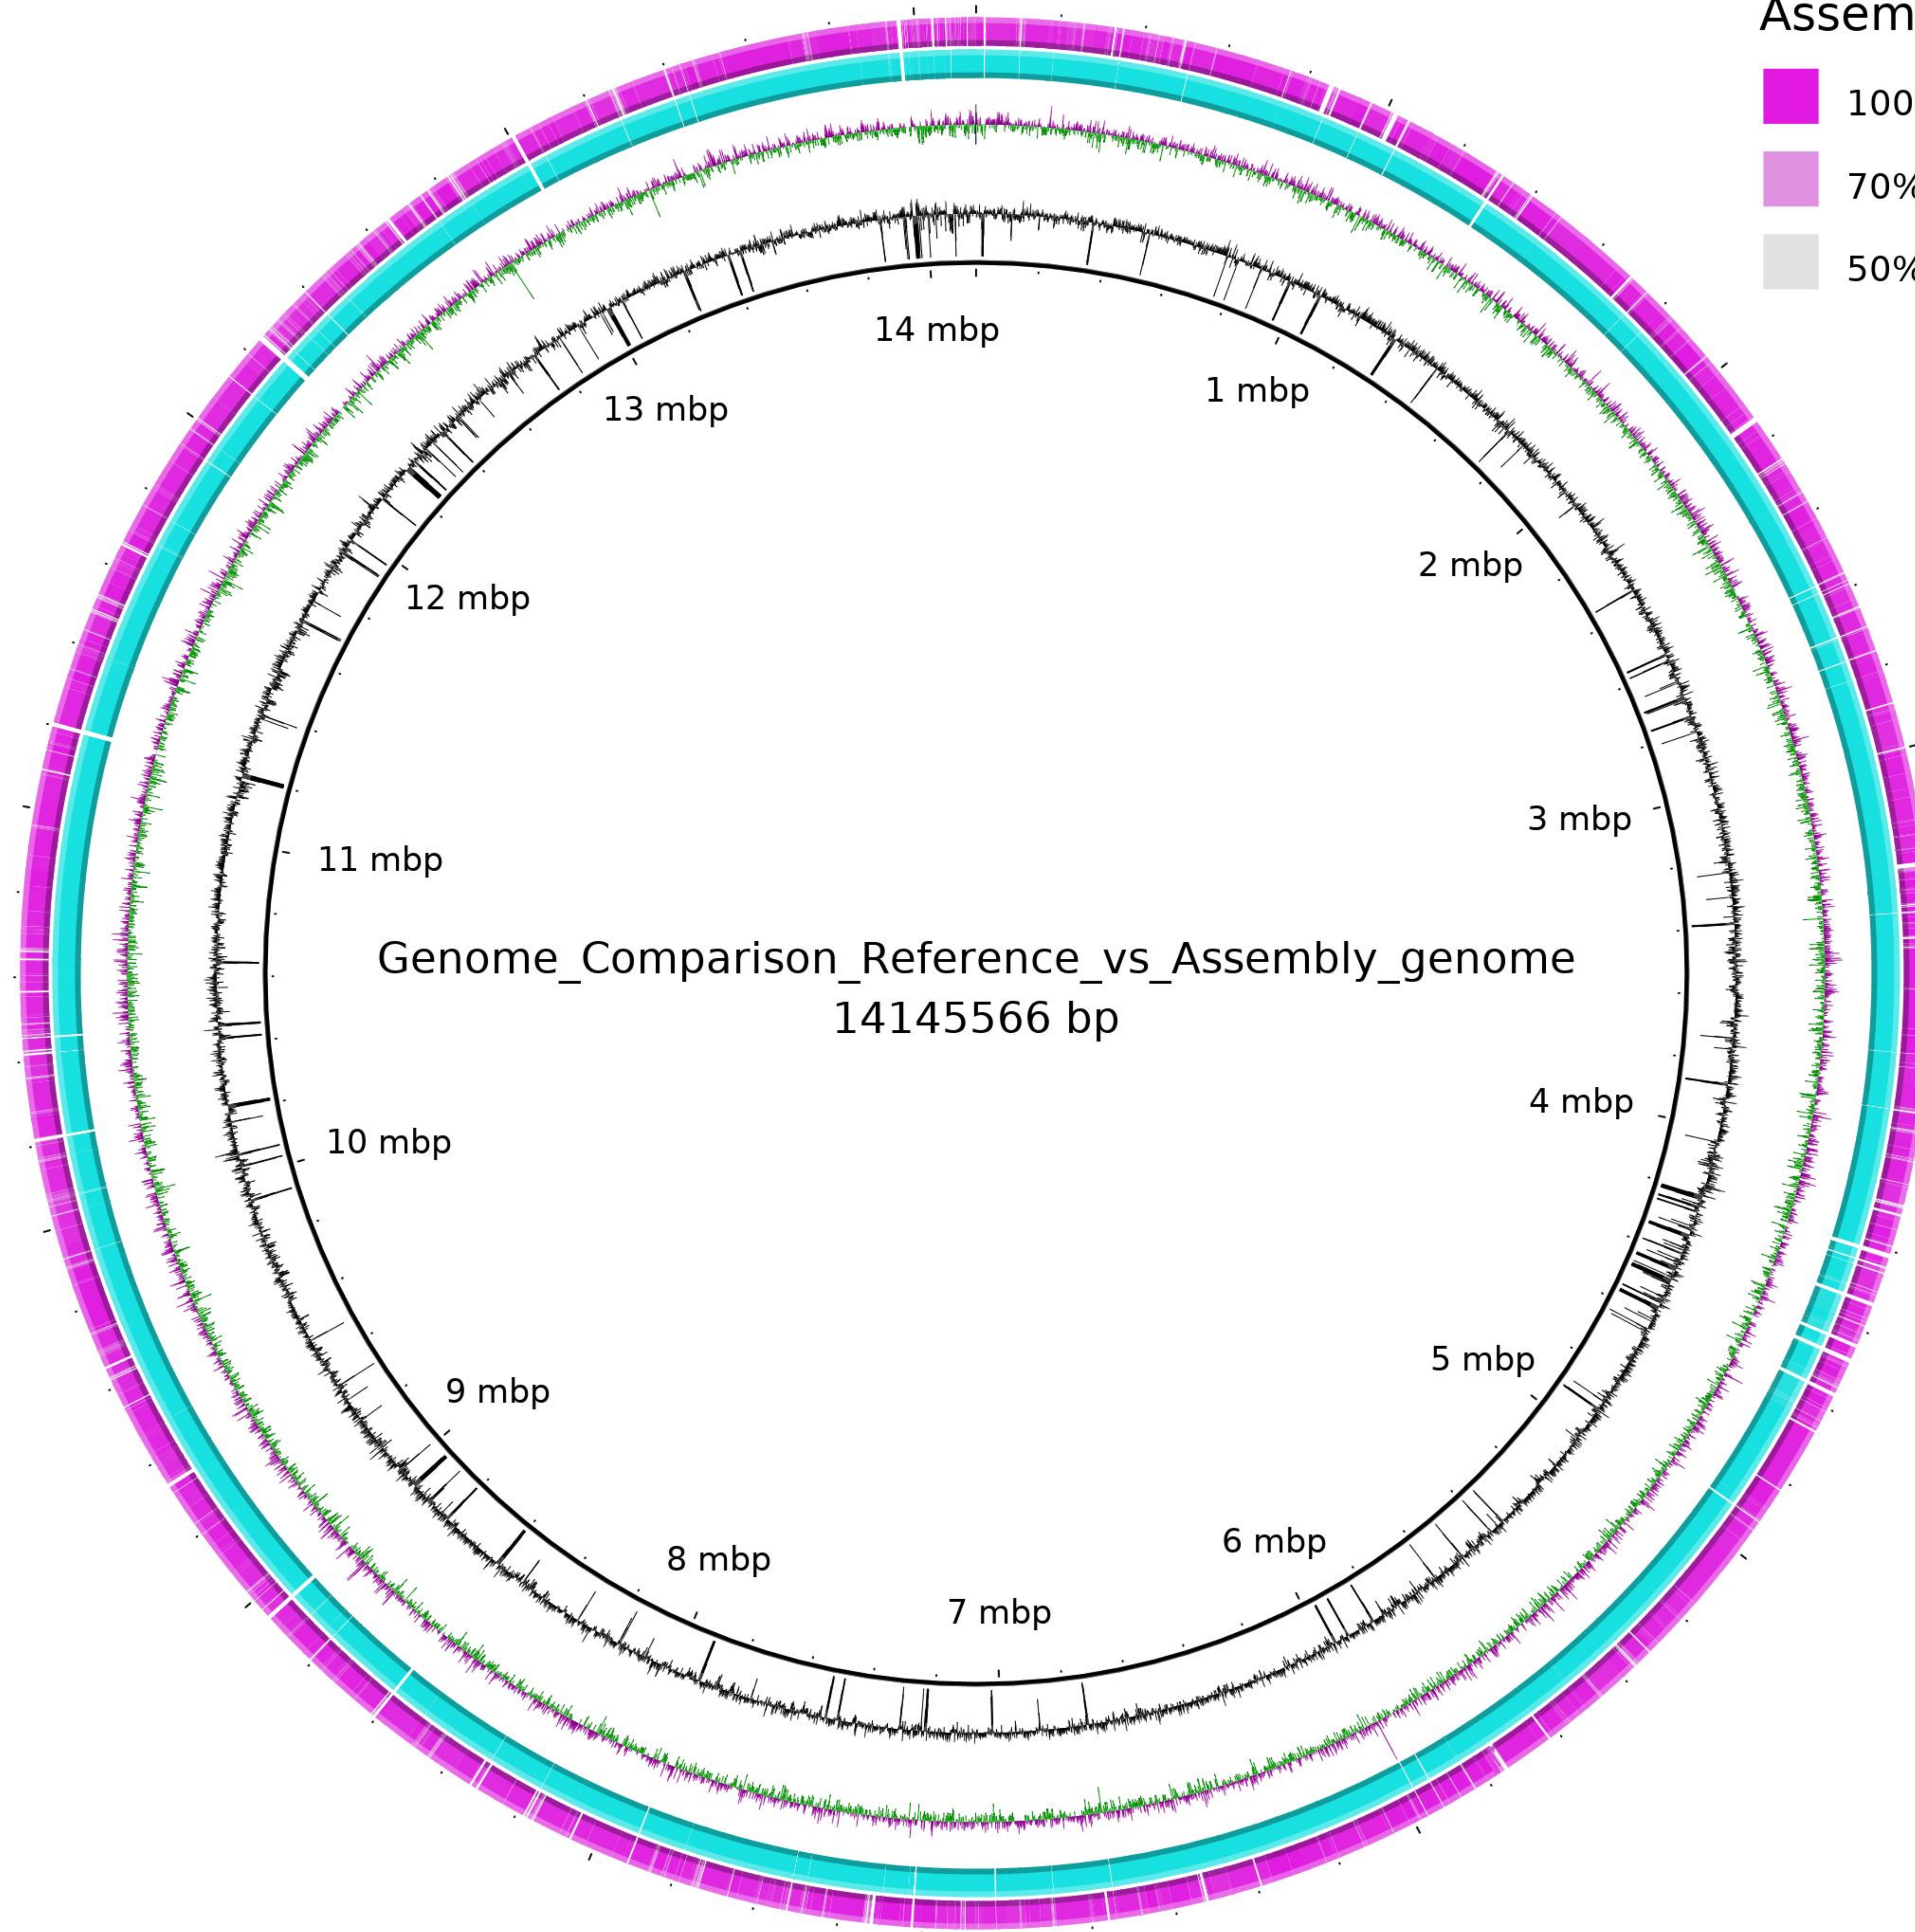



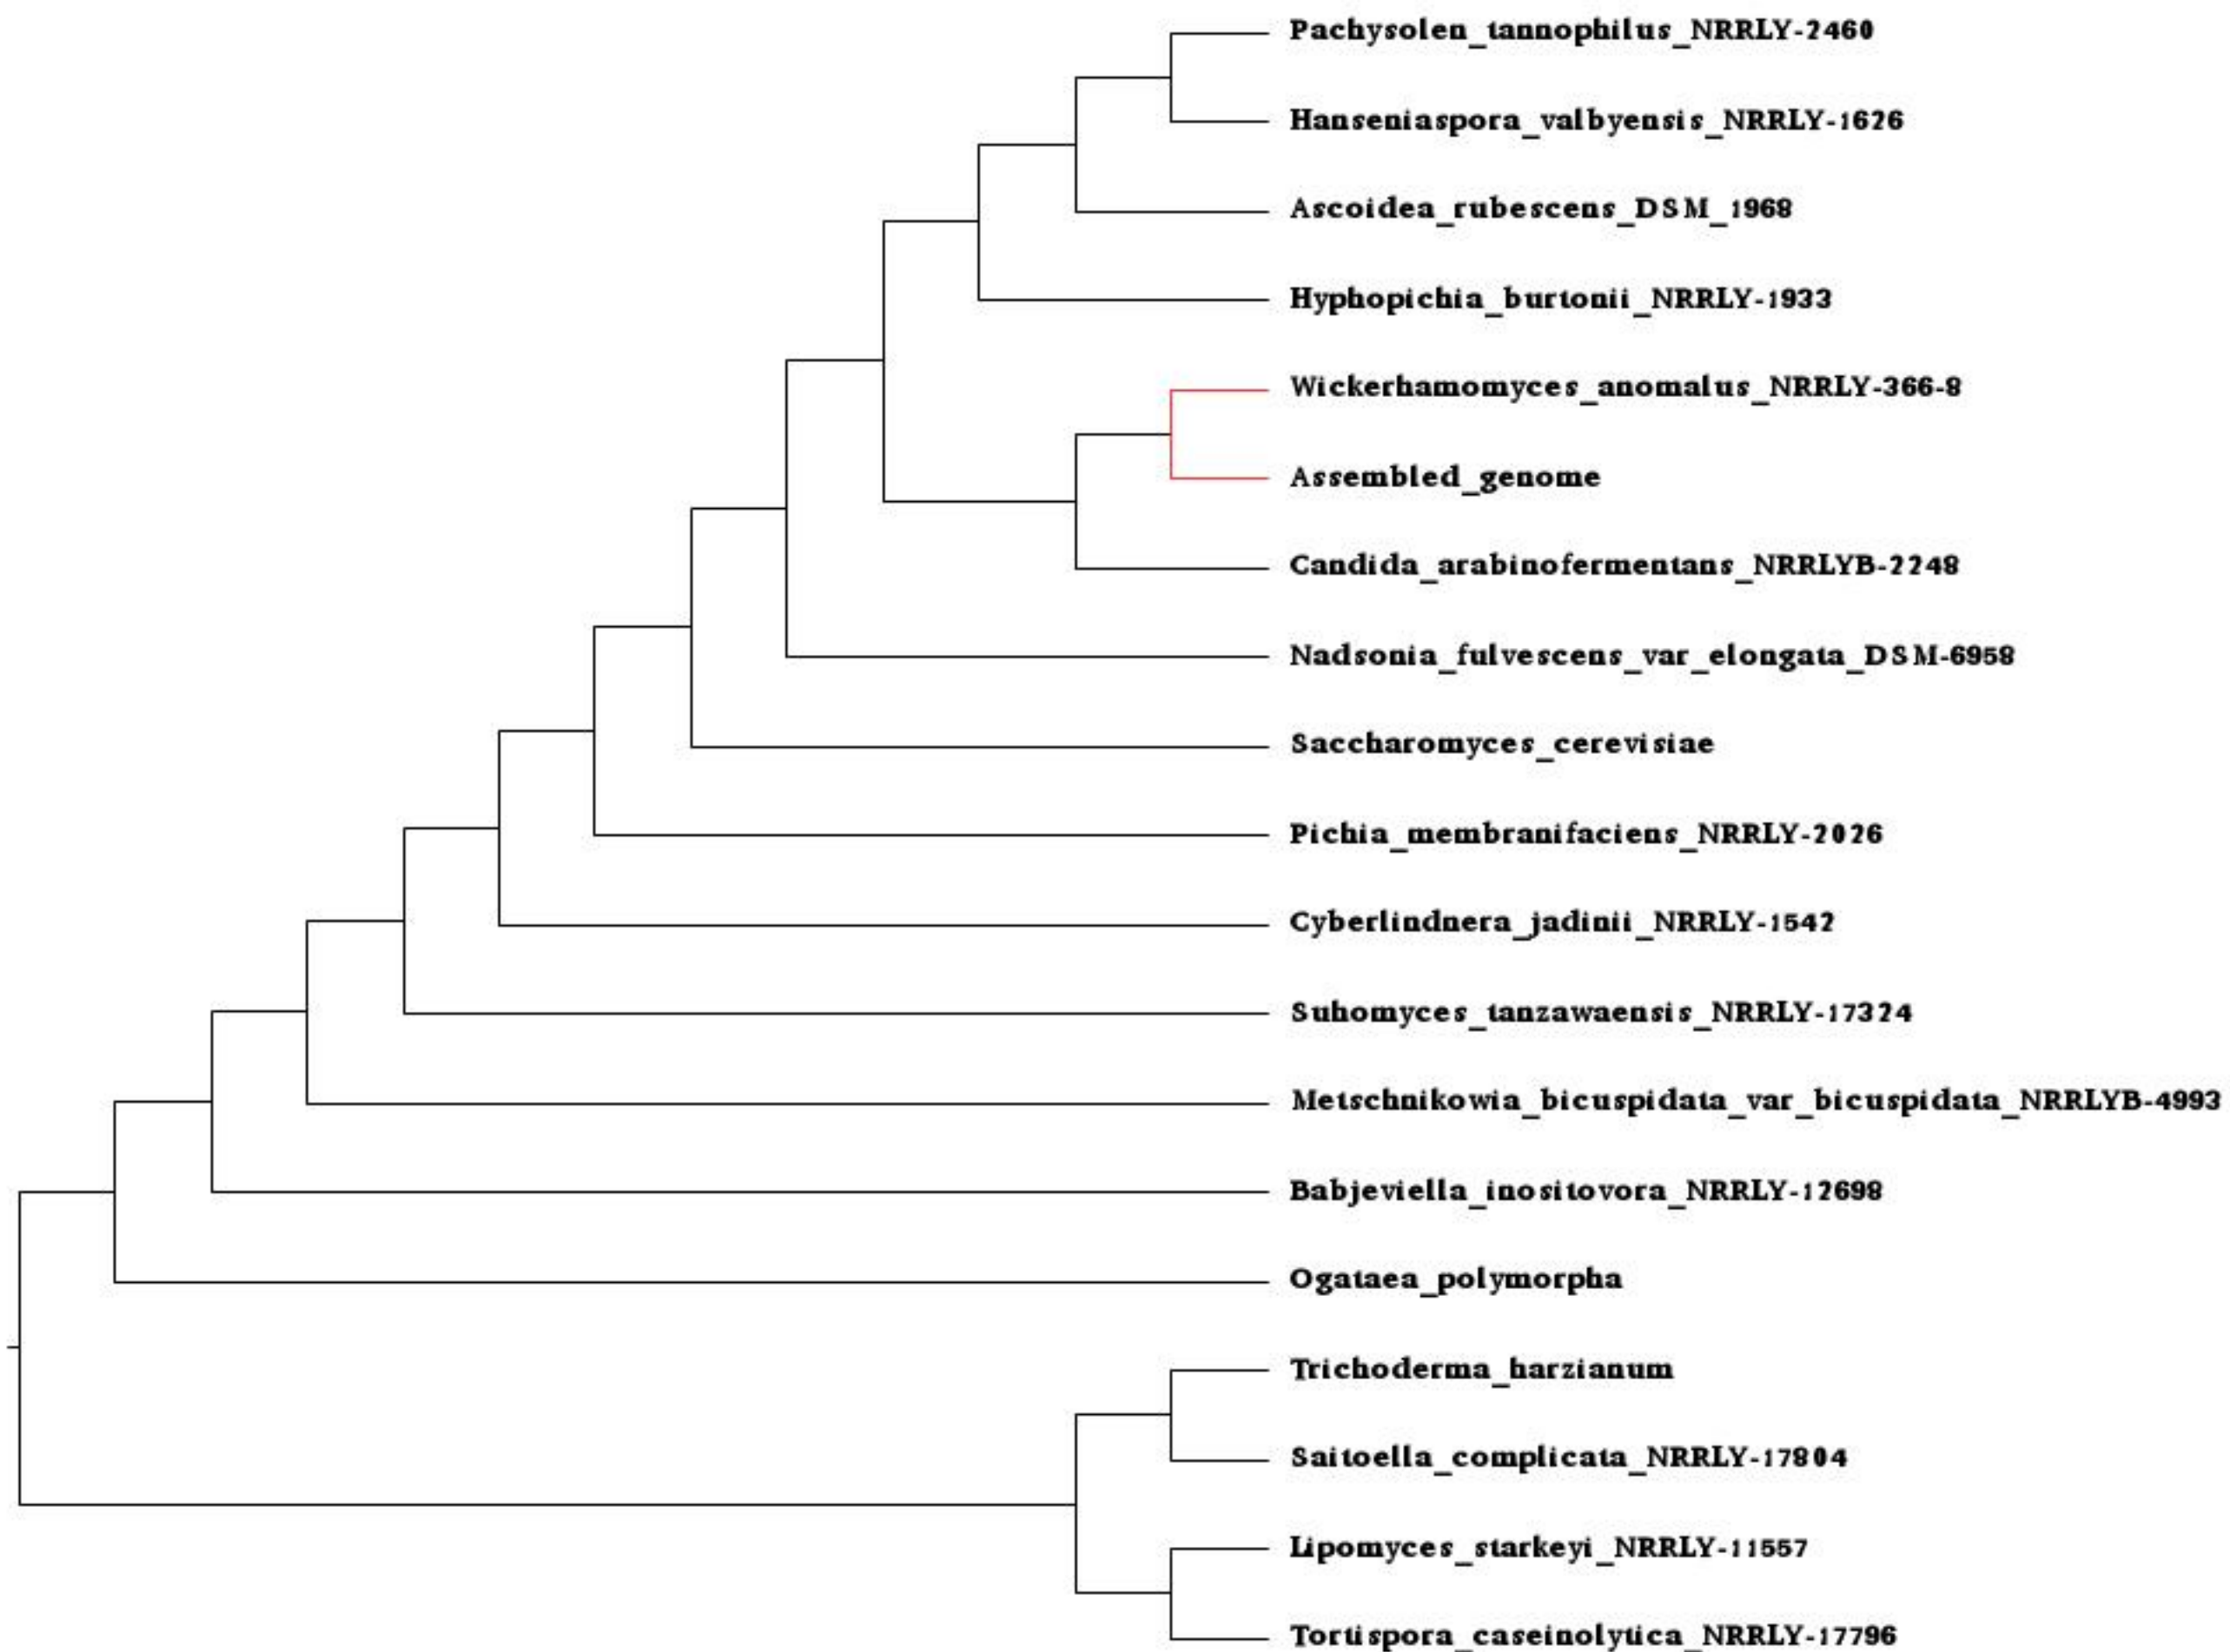



2000000

4000000

6000000

8000000

10000000

12000000

14000000

↑  
R  
↓

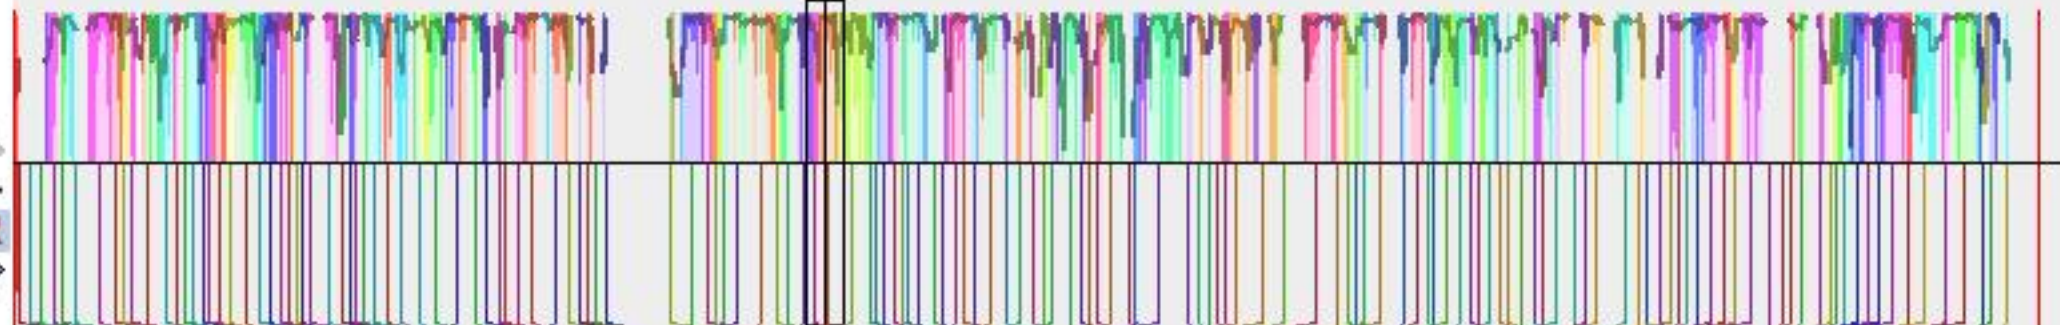

GCF\_001661255.1 Wtad1 genome.fasta

2000000

4000000

6000000

8000000

10000000

12000000

14000000

↑  
R  
↓

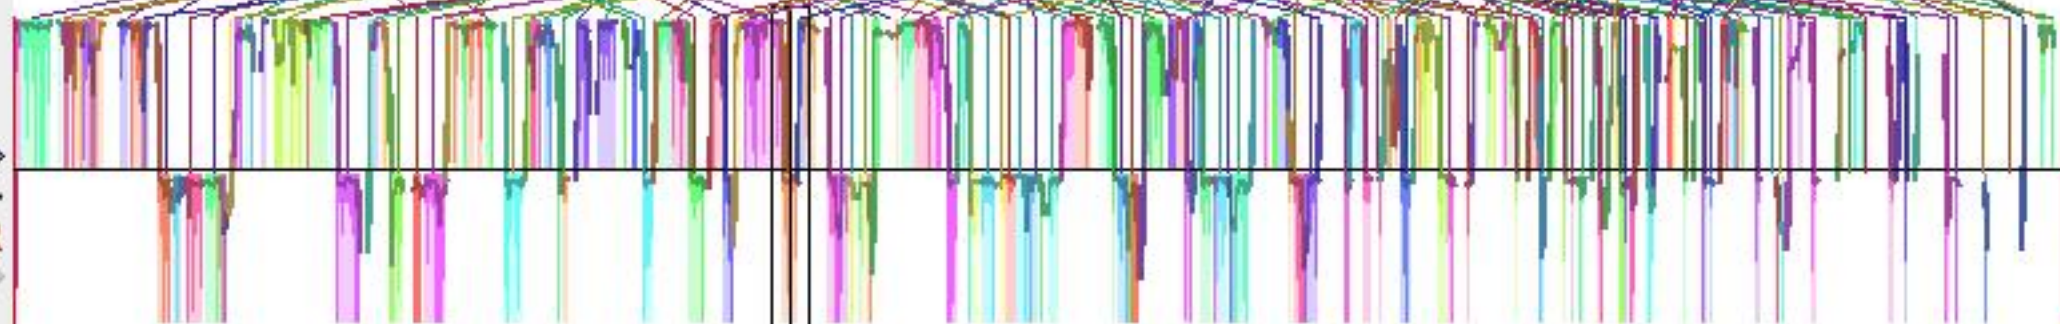

Assembly\_genome.fasta



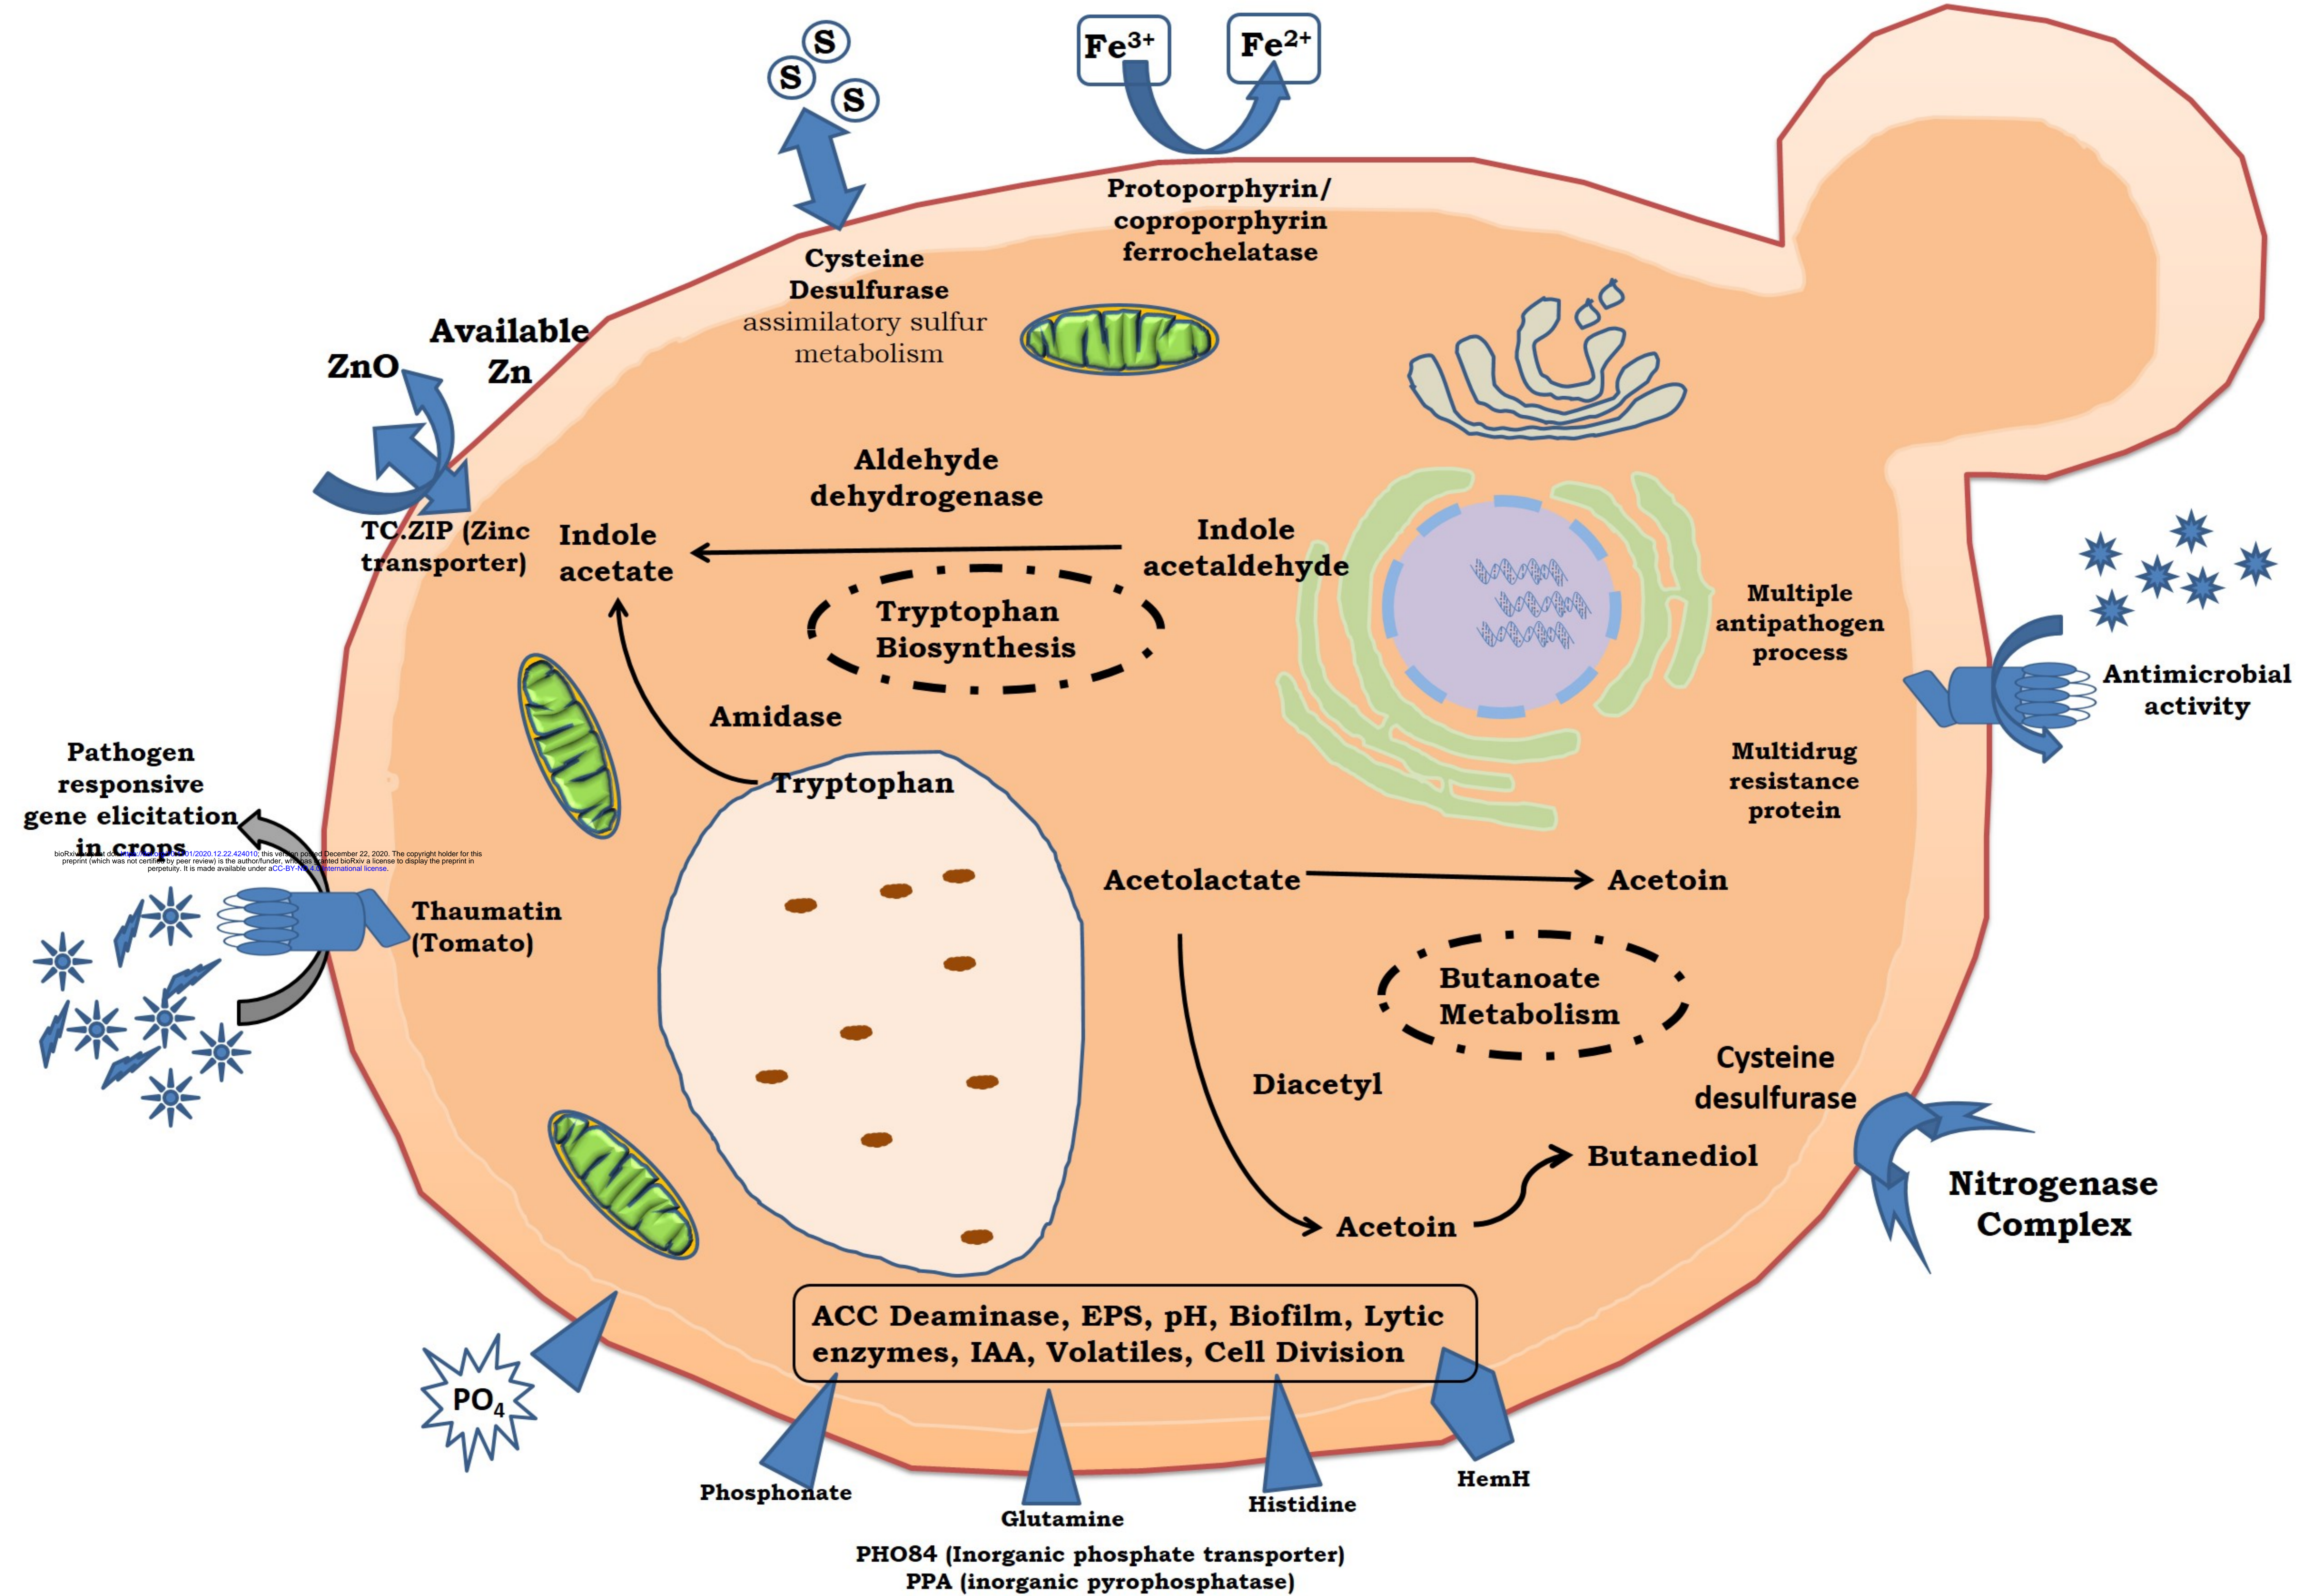

Source: https://www.biorxiv.org/content/10.1101/2020.12.22.424010v1.full.pdf
